# Supplementary material for: Differences in activity and stability drive transposable element variation in tropical and temperate maize
Source: HighWire-hosted journal article supplement (doi:10.1101/gr.278131.123), 2024-08-01
Supplement: Supplemental_Methods.docx [file Supplemental_Methods.docx]

## Supplemental Methods

### Alternative Scaffold Removal

Although the lines used to generate the 26 maize NAM founder genomes are highly inbred, there are still low levels of heterozygosity present as alternative scaffolds in these genomes. We collected known alternative scaffolds from MaizeGDB (<https://www.maizegdb.org/>), and further identified the remaining alternative scaffolds based on alignments to pseudomolecules. Unplaced scaffolds in each genome were aligned to their respective pseudomolecules using minimap2 (v2.24) [(Li 2018)](https://paperpile.com/c/gO1smU/jNFB8), and those having a mapping quality of 60 were considered alternative scaffolds (-minq 60). To avoid over-estimation of haploid assembly size and transposable element content, alternative scaffolds collected from MaizeGDB and identified in this study were removed from downstream analyses. After removing alternative scaffolds, the haploid assembly sizes were highly correlated with genome sizes (Pearson's r = 0.75, *P* = 8.97 x 10-6) that were estimated by flow cytometry [(Chia et al. 2012)](https://paperpile.com/c/gO1smU/Yfhp).

### Identification of syntenic LTR retrotransposons

Syntenic intact LTR-RTs [(Colle et al. 2019)](https://paperpile.com/c/gO1smU/GC23V) were identified from the panEDTA annotation of the intact LTR-RTs based on syntenic information flanking each element. Pairwise syntenic LTR-RTs were identified in pairs of two genomes with a total of 325 combinations of pairs between the 26 NAM founder genomes. To identify syntenic LTR-RTs between two genomes, two 1 kb sequences centered on the start and end position of each intact LTR-RT in both genomes were extracted and BLAST against the paired genome. BLAST hits to the orthologous chromosome (e.g., an intact LTR-RT from B73 Chr1 hitting the Chr1 of Tzi8) with an e-value < 1 x 10e-5 and query coverage > 40% were retained as candidate hits. Each hit was further classified as a full match if there was > 75% query coverage or a half match if there was ≤ 75% query coverage. Half matches were discarded if the majority of the hit (> 50% query coverage) was from the LTR portion of the 1-kb sequence, as these hits have a high probability of being off-target matches. If full matches were found for both 1-kb sequences from the LTR-RT in the same direction and the hits were ≥ 200 bp apart (non-empty sites) and less than or equal to the length of the intact LTR-RT plus 100 kb, then the locus was recorded as the syntenic full site of the intact LTR-RT. These parameters allow for both syntenic intact LTR-RTs and syntenic solo LTR-RTs to be identified (**Supplemental Fig. S16**). The lack of an identified insertion could be due to the full deletion of a preexisting LTR-RT insertion or the lack of insertion (a null site). To identify null sites, we required that half matches were found for flanking sequences of both the 1-kb sequences and that these were ≤ 10 bp apart. If an LTR-RT was not identified as a full site or a null site in the paired genome based on these criteria, it was recorded as missing data. If more than one full site or null site on the orthologous chromosome were observed, the LTR-RT was considered recalcitrant within a particular pair of genomes and was recorded as missing data in the paired genome. After the identification of syntenic loci in a genome, their coordinates were used to overlap with the TE annotation of that genome to obtain the exact coordinate of the syntenic LTR-RT. Because syntenic LTR-RTs were identified using all intact LTR-RTs of the genome pair, we further separated queries back to two genomes, resulting in reciprocal pairwise syntenic LTR-RT information with a total of 650 pairs of genomes.

To create the pan-LTR matrix, reciprocal pairwise syntenic LTR-RT results were joined in R (v3.6.3) using the left_join() function for each genome respectively via the script “create_pan_matrix_by_genome.R.” The LTR matrix for the 26 genomes was concatenated, then duplicated LTR coordinates were compressed using the script “compressing_duplicate_TE.R”. Briefly, LTR coordinates within each genome were searched for duplicates. Duplicate coordinates were compressed and LTR coordinates in other genomes were merged. For LTRs that have more than one hit after the compression, the LTRs were stored as semicolon-separated pairs. Finally, the “Resolve_conflict.py” script was used to merge LTRs coordinates. For the semicolon-separated LTRs, the entry containing an intact LTR was prioritized to retain, followed by truncated and null sites. LTRs whose presence/absence status could not be determined based on these parameters were considered missing data and demarcated as NA in the matrix. Data from the three admixed genomes (M37W, Mo18W, and Tx303) were removed from this study but retained in the data repository. Syntenic LTR-RTs with missing data rates over 50% within the tropical genomes, within the temperate genomes, or across all genomes were discarded.

To obtain the ancestral state of syntenic LTR-RTs, we extracted 500 bp sequences flanking the insertion site of syntenic LTR-RTs, with 250 bp on each side. Flanking sequences were combined to form 500 bp null site sequences and used to BLAST against the *Zea mays* ssp. *mexicana* genome. Null sites in the *Zea mays* ssp. *mexicana* genome were identified when a single BLAST hit covering ≥80% of the query with ≥95% identity was found in the genome. An age cutoff of ≤20 kya was also used to identify syntenic LTR-RTs that were inserted after the divergence between cultivated maize and its wild progenitor teosinte [(Chen et al. 2021)](https://paperpile.com/c/gO1smU/r3Bf0) and compared to the *Zea mays* ssp. *mexicana-*based polarization. Data of all syntenic LTRs in each genome can be accessed from MazieGDB: <https://ars-usda.app.box.com/v/maizegdb-public/folder/176805864056>.

### Identification of Single-Nucleotide Polymorphisms (SNPs)

To call SNPs for NAM founders against the *Zea mays* ssp. *mexicana* genome (GenBank PRJNA299874), we used the Genome Analysis Toolkit (GATK v4.2.2.0) and followed the Bioinformatics Workbook (<https://bioinformaticsworkbook.org/dataAnalysis/VariantCalling/gatk-dnaseq-best-practices-workflow.html>). In brief, short reads from the 26 NAM genomes were downloaded from CyVerse (ENA PRJEB31061) and were used for calling SNPs by mapping to the *Zea mays* ssp. *mexicana* genome as the reference. The GATK HaplotypeCaller [(McKenna et al. 2010; Poplin et al. 2018)](https://paperpile.com/c/gO1smU/0rFjU+YKsz8) and the Picard Toolkit (v2.26.6) (<http://broadinstitute.github.io/picard/>) were used for SNP discovery and final variant filtering. Picard FastqToSam was used to convert FASTQ format to SAM format, then Picard MarkIlluminaAdapters was used to mark Illumina adapters and generate metrics files. The SAM formatted files were converted back to interleaved FASTQ files using the Picard SamToFastq utility, which were then mapped to the BWA-MEM-indexed *Zea mays* ssp. *mexicana* genome using recommended options (-M) [(Li and Durbin 2009)](https://paperpile.com/c/gO1smU/VRVlH). The aligned reads were merged with unaligned reads using Picard MergeBamAlignment, marking duplicates with Picard MarkDuplicates. In the last step of processing BAM files, AddOrReplaceReadGroups was used to add the correct read-group identifier before calling variants with HaplotypeCaller. HaplotypeCaller was trivially parallelized by running simultaneously on 2-Mb intervals of the genome (587 chunks, excluding scaffolds), and the VCF files were gathered to generate a merged, coordinate-sorted, unfiltered set of SNPs. Stringent filtering was performed on the raw set of SNPs using the expression (QD < 2.0 || FS > 60.0 || MQ < 45.0 || MQRankSum < -12.5 || ReadPosRankSum < -8.0 || DP > 5061), where DP was estimated from the DP values of the SNPs (standard deviation times 5 + mean). This set was filtered to retain only homozygous, biallelic SNPs, which are available via MaizeGDB: <https://ars-usda.app.box.com/v/maizegdb-public/folder/176805864056>. BCFtools (v1.9) [(Danecek and McCarthy 2017)](https://paperpile.com/c/gO1smU/fRiQw) was used to control missing data rate ≤50% with parameters “view -e 'F_MISSING>=0.5'.” The VCFtools (v0.1.16) [(Danecek et al. 2011)](https://paperpile.com/c/gO1smU/0kNN2) vcf-subset utility was used to split VCF files into tropical and temperate subpopulations.

## REFERENCES

[Chen L, Luo J, Jin M, Yang N, Liu X, Peng Y, Li W, Qing L, Yin Y, Ye X, et al. 2021. Portrait of a genus: the genetic diversity of Zea. *bioRxiv* 2021.04.07.438828.](http://paperpile.com/b/gO1smU/r3Bf0) <https://www.biorxiv.org/content/10.1101/2021.04.07.438828v1.abstract> [(Accessed November 25, 2021).](http://paperpile.com/b/gO1smU/r3Bf0)

[Chia J-M, Song C, Bradbury PJ, Costich D, de Leon N, Doebley J, Elshire RJ, Gaut B, Geller L, Glaubitz JC, et al. 2012. Maize HapMap2 identifies extant variation from a genome in flux. *Nat Genet* **44**: 803–807.](http://paperpile.com/b/gO1smU/Yfhp)

[Colle M, Leisner CP, Wai CM, Ou S, Bird KA, Wang J, Wisecaver JH, Yocca AE, Alger EI, Tang H, et al. 2019. Haplotype-phased genome and evolution of phytonutrient pathways of tetraploid blueberry. *Gigascience* **8**.](http://paperpile.com/b/gO1smU/GC23V) <http://dx.doi.org/10.1093/gigascience/giz012>[.](http://paperpile.com/b/gO1smU/GC23V)

[Danecek P, Auton A, Abecasis G, Albers CA, Banks E, DePristo MA, Handsaker RE, Lunter G, Marth GT, Sherry ST, et al. 2011. The variant call format and VCFtools. *Bioinformatics* **27**: 2156–2158.](http://paperpile.com/b/gO1smU/0kNN2)

[Danecek P, McCarthy SA. 2017. BCFtools/csq: haplotype-aware variant consequences. *Bioinformatics* **33**: 2037–2039.](http://paperpile.com/b/gO1smU/fRiQw)

[Li H. 2018. Minimap2: pairwise alignment for nucleotide sequences. *Bioinformatics* **34**: 3094–3100.](http://paperpile.com/b/gO1smU/jNFB8)

[Li H, Durbin R. 2009. Fast and accurate short read alignment with Burrows-Wheeler transform. *Bioinformatics* **25**: 1754–1760.](http://paperpile.com/b/gO1smU/VRVlH)

[McKenna A, Hanna M, Banks E, Sivachenko A, Cibulskis K, Kernytsky A, Garimella K, Altshuler D, Gabriel S, Daly M, et al. 2010. The Genome Analysis Toolkit: a MapReduce framework for analyzing next-generation DNA sequencing data. *Genome Res* **20**.](http://paperpile.com/b/gO1smU/0rFjU) <https://pubmed.ncbi.nlm.nih.gov/20644199/> [(Accessed December 19, 2021).](http://paperpile.com/b/gO1smU/0rFjU)

[Poplin R, Chang PC, Alexander D, Schwartz S, Colthurst T, Ku A, Newburger D, Dijamco J, Nguyen N, Afshar PT, et al. 2018. A universal SNP and small-indel variant caller using deep neural networks. *Nat Biotechnol* **36**.](http://paperpile.com/b/gO1smU/YKsz8) <https://pubmed.ncbi.nlm.nih.gov/30247488/> [(Accessed December 19, 2021).](http://paperpile.com/b/gO1smU/YKsz8)
