# Supplementary material for: Differences in activity and stability drive transposable element variation in tropical and temperate maize
Source: HighWire-hosted journal article supplement (doi:10.1101/gr.278131.123), 2024-08-01
Supplement: Supplemental_Table_S1.xlsx [file Supplemental_Table_S1.xlsx]

## Sheet: Supplemental Table S1
Supplemental Table S1. The number of intact LTR and LTR clades found in dynamic categories. Blue shading indicates significantly depleted clade number, pink shading indicates significantly enriched clade number.
		Ale	Angela	Bianca	chromo-unclass	CRM	Ikeros	Ivana	Ogre	Reina	Retand	Selgy	SIRE	TAR	Tekay	Tork
Tropical amplification	Intact LTR #	262	3	0	1	941	224	111	1	851	143527	5	182858	796	137633	187
	Family #	3	0	0	0	3	3	2	0	9	21	0	11	1	12	2
	P value	0.0470589	0.733529	0.0052398	0.733529	0.490404	0.897543	0.377741	0.55481	0.0395945	7.94747e-06	0.733529	0.133553	0.335762	0.279771	0.848578
Temperate removal	Intact LTR #	0	0	0	0	12136	0	0	3690	95	93762	0	60073	3056	63	0
	Family #	0	0	0	0	1	0	0	1	1	8	0	4	1	0	0
	P value	0.136216	0.873285	0.190888	0.873285	0.460778	0.397583	0.339726	0.000567185	0.0989443	1.74287e-05	0.873285	0.0696429	0.00364395	0.107718	0.505479
Temperate amplification	Intact LTR #	1865	0	9	0	0	700	3	6	1551	0	0	3	0	15	0
	Family #	8	0	1	0	0	2	1	1	11	0	0	0	0	0	0
	P value	0.00096847	0.844154	0.367697	0.844154	0.372184	0.300075	0.806333	0.00655391	0.00866092	0.0474041	0.844154	0.0793666	0.693519	0.0474041	0.411773
Tropical removal	Intact LTR #	56	0	0	0	956	0	0	0	354	5356	0	0	0	0	4
	Family #	2	0	0	0	1	0	0	0	1	1	0	0	0	0	0
	P value	0.0517273	0.929568	0.468533	0.929568	0.0284699	0.639196	0.596738	0.878138	0.851836	0.676415	0.929568	0.430228	0.859361	0.372688	0.712099
Balanced (trop < temp)	Intact LTR #	578	0	0	0	0	0	0	0	33	24813	0	465	0	22	0
	Family #	1	0	0	0	0	0	0	0	1	4	0	2	0	0	0
	P value	0.959334	0.910772	0.358071	0.910772	0.610949	0.552237	0.502327	0.845859	0.459281	0.00254209	0.910772	0.202386	0.822249	0.25837	0.639858
Balanced (trop > temp)	Intact LTR #	0	0	0	0	4238	0	82	0	138	5948	0	1823	1986	4	62
	Family #	0	0	0	0	2	0	1	0	2	1	0	3	1	0	1
	P value	0.218475	0.895207	0.280044	0.895207	0.0035732	0.484768	0.566348	0.81926	0.673224	0.658557	0.895207	0.0816101	0.000303024	0.184025	0.177054
Drifting (trop < temp)	Intact LTR #	6554	9597	36	0	3109	221	759	12	4523	66249	0	74914	3151	7609	12
	Family #	26	1	1	0	1	8	9	0	58	15	0	15	1	5	1
	P value	0.0068811	0.0582293	6.04487e-05	0.596937	0.0642235	0.315982	0.500621	0.358959	2.48867e-08	0.242688	0.596937	0.879721	0.87751	7.9789e-05	0.106774
Drifting (trop > temp)	Intact LTR #	4908	0	1955	1	16435	163	4084	9327	2776	113608	3	162884	0	20706	83
	Family #	19	0	5	0	5	8	16	1	49	32	0	31	0	11	2
	P value	0.526243	0.535528	0.000346037	0.535528	0.783334	0.819804	0.00959671	0.827298	0.153777	0.0509605	0.535528	0.00145519	0.21421	0.000603687	0.136602
Other	Intact LTR #	3748	79	1645	6	499	29	795	635	7114	37681	0	9383	136	33527	222
	Family #	18	0	54	1	7	6	5	0	20	6	1	5	0	60	11
	P value	0.165492	0.5105	0	0.128015	0.633768	0.357132	0.0433723	0.253635	1.69952e-07	2.77905e-07	0.128015	6.71133e-06	0.187105	0	0.00167763
