# Supplementary material for: Differences in activity and stability drive transposable element variation in tropical and temperate maize
Source: HighWire-hosted journal article supplement (doi:10.1101/gr.278131.123), 2024-08-01
Supplement: Supplemental_Table_S2.xlsx [file Supplemental_Table_S2.xlsx]

## Sheet: Supplemental Table S2
Supplemental Table S2. Classification of major LTR families based on age distribution.
LTR family	LTR clade	Classification	Trop - Temp diff (Mb)	Avg fam size (Mb)
xilon_diguus_AC203313_7774	Tekay	Young	4.38498	66.5469
ji_AC215728_13156	SIRE	Young	2.96888	15.8741
cinful_zeon_AC206171_9091	Retand	Young	1.58061	5.79398
chr6_P_87978263	SIRE	Moderate	1.52844	78.0689
opie_AC198924_6206	SIRE	Young	1.50866	5.03202
cinful_zeon_AC201757_7049	Retand	Young	1.45788	12.852
CRM2_7577nt	CRM	Young	1.23011	5.17833
cinful_zeon_AC209373_10201	Retand	Young	1.03952	8.47916
doke_AC197224_5479	Retand	Old	0.941373	38.7196
cinful_zeon_AC186530_1513	Retand	Young	0.864855	5.45561
prem1_AC196065_4927	Tekay	Young	0.847541	24.027
prem1_AC206253_9147	NA	Young	0.824925	19.2888
cinful_zeon_AC194954_4372	Retand	Young	0.785689	2.09042
cinful_zeon_AC199790_6582	Retand	Young	0.714358	3.41208
cinful_zeon_AC194347_4039	Retand	Young	0.686307	8.37577
ji_AC204382_8228	NA	Young	0.663067	14.2239
gyma_AC198939_6228	Tekay	Moderate	0.530723	27.2907
flip_AC208040_9765	Tekay	Moderate	0.515936	13.919
sagyfy_AC187059_1735	Ivana	Young	0.496738	3.07957
flip_AC211750_11412	Tekay	Moderate	0.478651	11.961
cinful_zeon_AC207755_9705	Retand	Young	0.46126	2.74934
opie_AC202033_7274	SIRE	Young	0.456165	11.5574
uwum_AC177933_415	NA	Young	0.443701	5.75313
flip_AC194904_4319	Tekay	Moderate	0.427092	10.5688
giepum_AC197531_5634	SIRE	Young	0.414185	9.71344
chr9_D_32444039	SIRE	Young	0.409046	6.39609
flip_AC193970_3791	Tekay	Old	0.40787	20.7901
odoj_AC194387_4072	NA	Young	0.399693	4.2871
uwum_AC190887_2701	NA	Young	0.396584	6.34872
ruda_AC195952_4839	SIRE	Young	0.389494	6.08239
prem1_AC212325_11702	Tekay	Young	0.35483	16.7107
flip_AC214266_12595	Tekay	Old	0.354435	12.1676
ji_AC211489_11215	SIRE	Old	0.342757	22.2505
gyma_AC197250_5506	Tekay	Old	0.334907	16.7624
cinful_zeon_AC206615_9266	Retand	Old	0.307683	6.90046
opie_AC198173_5898	SIRE	Old	0.29966	22.8475
prem1_AC200105_6751	Tekay	Young	0.288091	6.31221
ji_AC200613_6936	SIRE	Young	0.28705	1.16487
giepum_AC211251_11074	SIRE	Young	0.27931	11.6139
cinful_zeon_AC203004_7602	Retand	Old	0.272323	21.598
uwum_AC213069_12092	Tekay	Young	0.266822	4.18525
cinful_zeon_AC205031_8560	Retand	Old	0.262756	6.03683
milt_AC211742_11402	Ogre	Moderate	0.226588	15.4228
tekay_AC211245_11065	Tekay	Moderate	0.224975	9.16739
iteki_AC214131_12504	Tekay	Old	0.22333	21.3152
huck_AC210079_10574	Retand	Old	0.215039	28.7007
chr6_D_62813001	SIRE	Young	0.210956	4.97108
cinful_zeon_AC208228_9805	Retand	Moderate	0.200517	4.52837
huck_AC199444_6460	Retand	Old	0.196644	4.97672
gyma_AC206653_9288	Tekay	Old	0.193739	9.68508
doke_AC186158_1307	Retand	Old	0.190013	6.51447
cinful_zeon_AC177813_189	Retand	Old	0.185847	5.51936
opie_AC214122_12495	SIRE	Old	0.185024	20.6026
huck_AC203007_7610	Retand	Old	0.183797	2.60294
cinful_zeon_AC177930_407	Retand	Moderate	0.178782	4.66593
peeve_AC209948_10499	Retand	Moderate	0.17789	3.07286
dagaf_AC208646_9966	Tekay	Old	0.172109	4.92649
chr4_P_242404877	SIRE	Old	0.157928	9.44196
opie_AC197201_5474	SIRE	Old	0.142108	14.6881
opie_AC188002_2029	SIRE	Moderate	0.141998	4.90802
nida_AC206942_9401	SIRE	Moderate	0.140484	6.80424
huck_AC216048_13250	Retand	Old	0.140414	31.1786
machiavelli_AC200490_6883	TAR	Young	0.138469	3.39448
chr5_P_9712308	SIRE	Moderate	0.134341	2.24072
chr8_P_116327109	SIRE	Moderate	0.132797	2.3849
ji_AC202456_7443	SIRE	Old	0.129273	4.12888
cinful_zeon_AC192460_3502	Retand	Young	0.128971	0.361025
chr5_P_76002780	SIRE	Moderate	0.127398	4.93158
nihep_AC194441_4115	Retand	Young	0.127022	5.16113
cinful_zeon_AC210140_10614	Retand	Moderate	0.124191	2.98563
chr4_P_103002213	SIRE	Moderate	0.119547	5.94125
cinful_zeon_AC199960_6694	Retand	Old	0.118593	2.19645
mada_AC208456_9876	Retand	Old	0.11633	12.3372
ruda_AC202870_7495	SIRE	Old	0.111018	8.6199
xilon_diguus_AC185317_1058	NA	Moderate	0.110423	12.4689
chr5_P_133655019	SIRE	Old	0.110259	2.42558
cinful_zeon_AC186614_1565	Retand	Old	0.106234	5.06065
chr1_D_275633391	SIRE	Moderate	0.105717	5.3384
gyma_AC212146_11616	NA	Moderate	0.104762	4.16273
leviathan_AC208826_10024	Tekay	Old	0.104108	6.6337
milt_AC198975_6250	Ogre	Moderate	0.0998417	4.24934
cinful_zeon_AC194588_4160	Retand	Old	0.0988365	0.88762
chr6_D_43881252	SIRE	Old	0.097883	9.06567
cinful_zeon_AC208420_9852	Retand	Young	0.0965121	1.15491
cinful_zeon_AC203825_7980	Retand	Old	0.0939926	3.84357
liove_AC207121_9462	Retand	Young	0.0911599	0.492186
cinful_zeon_AC198933_6214	Retand	Old	0.0883153	8.60439
ji_AC193479_3665	SIRE	Old	0.0882912	13.7274
fourf_AC202975_7570	TAR	Young	0.0866811	2.77564
flip_AC213672_12280	Tekay	Old	0.0862478	11.8665
chr9_D_120499978	SIRE	Old	0.0859358	6.8804
cinful_zeon_AC211144_11003	Retand	Old	0.085454	3.24692
huck_AC210804_10865	Retand	Old	0.0831092	4.61826
huck_AC186577_1525	Retand	Old	0.082573	18.1719
dagaf_AC182835_556	Tekay	Old	0.0805543	5.24018
chr10_P_98050947	SIRE	Moderate	0.0799896	13.9196
cinful_zeon_AC213887_12415	Retand	Old	0.0781231	5.70709
mada_AC211927_11478	Retand	Old	0.076064	4.03953
chr9_P_79032327	SIRE	Moderate	0.0759221	9.14221
cinful_zeon_AC205768_9013	Retand	Moderate	0.0728147	2.90377
opie_AC196469_5133	SIRE	Old	0.0659373	9.20877
gyma_AC190530_2365	NA	Moderate	0.0655669	3.76721
gori_AC193308_3536	SIRE	Old	0.0634955	5.12059
grande_AC197914_5823	NA	Moderate	0.0613449	2.60065
cinful_zeon_AC207332_9527	Retand	Old	0.0589703	1.80811
cinful_zeon_AC211573_11290	Retand	Old	0.0545283	8.36468
opie_AC197084_5382	SIRE	Old	0.0499889	1.73499
cinful_zeon_AC194967_4388	Retand	Old	0.0444128	2.93253
huck_AC208842_10038	Retand	Old	0.0385244	16.6906
dapuuv_AC217549_13514	NA	Moderate	0.0382889	1.98167
cinful_zeon_AC200200_6794	Retand	Old	0.037596	8.59375
chr4_D_46804832	SIRE	Old	0.0375301	1.50725
naadira_AC201761_7053	CRM	Old	0.0357646	0.834397
guhis_AC198413_5999	CRM	Old	0.0357272	2.57255
CRM1_6867nt	CRM	Young	0.0354511	2.11654
mada_AC208673_9982	Retand	Old	0.0329868	2.10699
huck_AC214833_12913	Retand	Old	0.0324209	6.42839
ji_AC209892_10463	NA	Young	0.0309733	11.5695
cinful_zeon_AC191398_3106	NA	Old	0.0293941	1.45606
uloh_AC209080_10120	NA	Young	0.0289468	0.864778
avahi_AC191363_3084	NA	Young	0.0278399	0.222108
chr4_P_19323329	SIRE	Moderate	0.0274984	0.69207
bipide_AC205969_9058	Ivana	Young	0.0252291	1.59042
kameer_AC194009_3819	Ale	Young	0.0251238	1.79966
CRM3_7412nt	CRM	Moderate	0.0233281	0.482058
pute_AC197188_5467	Ale	Young	0.0230455	0.578714
japov_AC213985_12447	NA	Young	0.0223897	0.318062
kake_AC186604_1559	Bianca	Young	0.0213893	0.446747
raider_AC197426_5583	Ivana	Young	0.0212849	0.333217
tekay_AC200856_6996	NA	Young	0.0212791	2.14442
puck_AC215312_13067	Retand	Old	0.0210928	2.87637
bosohe_AC191654_3248	Reina	Young	0.0210708	0.239426
opie_AC187149_1780	SIRE	Moderate	0.020941	0.332514
huck_AC190900_2713	Retand	Old	0.0209156	7.1536
cinful_zeon_AC215255_13029	Retand	Old	0.0208464	1.60142
ansuya_AC191576_3184	CRM	Young	0.0181565	0.374018
cinful_zeon_AC199396_6426	Retand	Moderate	0.0169756	0.709476
eugene_AC200048_6717	CRM	Moderate	0.0168124	0.518165
chr4_P_118808430	SIRE	Old	0.0156612	1.58864
ji_AC213834_12382	SIRE	Old	0.0151715	21.7139
ruda_AC206281_9164	SIRE	Moderate	0.0147053	1.23625
victim_AC183319_577	Ale	Moderate	0.0139275	0.275955
cinful_zeon_AC193672_3742	Retand	Old	0.0126327	5.88382
milt_AC209648_10275	NA	Old	0.0125902	1.99879
bobobo_AC201919_7182	Reina	Young	0.0108361	0.0583517
tata_AC205418_8792	Ale	Moderate	0.010184	0.0991261
ovamef_AC196977_5281	Reina	Young	0.00992804	0.0304472
eninu_AC191055_2893	TAR	Moderate	0.00870033	1.61436
homy_AC197914_5822	Ale	Young	0.00634545	0.132181
cinful_zeon_AC212696_11896	Retand	Old	0.00570128	6.77782
debeh_AC177840_246	Bianca	Moderate	0.00567002	0.507977
ahov_AC193643_3726	Ivana	Young	0.00348356	0.115859
kubi_AC196180_5016	Reina	Young	0.00325504	0.201108
tuteh_AC183372_584	NA	Moderate	0.00309399	0.310273
cinful_zeon_AC216587_13387	Retand	Young	0.000306762	0.702678
chr2_D_224980689	SIRE	Old	0.000266046	8.03426
naadira_AC206864_9376	CRM	Old	0.0002328	3.21152
fehod_AC184774_851	Ivana	Young	-1.98308e-05	0.0999798
TE_00011066	NA	Young	-0.00102729	0.0903892
apil_AC198662_6085	Reina	Moderate	-0.00265505	0.12897
bovo_AC197547_5647	Ale	Moderate	-0.00302428	0.0987474
ebel_AC213044_12072	Ale	Young	-0.00393382	0.60658
ovikoh_AC200886_1_999999	Reina	Moderate	-0.0041195	0.0565893
lowy_AC190530_2366	Reina	Young	-0.00444035	0.0642898
wiwa_AC191531_3153	Angela	Moderate	-0.00497659	5.68937
sokiit_AC210743_10848	Reina	Moderate	-0.00595512	0.0718363
yfages_AC197085_5383	Reina	Moderate	-0.0060172	0.0556234
lamyab_AC208713_10008	Reina	Moderate	-0.00622897	0.21068
opie_AC197691_5727	SIRE	Old	-0.00628929	1.30846
ji_AC207234_9488	SIRE	Old	-0.00680054	4.76633
chr5_D_119412279	SIRE	Young	-0.00729725	5.97989
bogu_AC196148_4995	Reina	Moderate	-0.00756658	0.266331
cinful_zeon_AC205118_8623	Retand	Young	-0.0112416	1.37942
chr7_D_125343800	SIRE	Old	-0.0117809	3.80087
huck_AC191259_3001	Retand	Old	-0.012926	8.41184
stonor_AC212476_11849	Ikeros	Young	-0.0131853	0.701241
huck_AC213042_12069	Retand	Old	-0.0136161	2.76489
wamenu_AC191287_3028	Ale	Young	-0.013652	0.22716
huck_AC213612_12218	Retand	Old	-0.0138871	15.4728
cinful_zeon_AC202991_7588	Retand	Old	-0.0153113	3.46375
depuw_AC208349_9837	Ale	Young	-0.0162433	0.214047
hesa_AC204349_8207	Ale	Moderate	-0.018979	0.181627
bosohe_AC205330_8724	Reina	Moderate	-0.0194031	0.401659
flip_AC203163_7675	Tekay	Old	-0.0233397	13.8883
cinful_zeon_AC208661_9976	Retand	Old	-0.0234709	0.849729
huck_AC193313_3542	Retand	Old	-0.0240727	7.9399
opie_AC211653_11340	SIRE	Old	-0.0250712	1.43127
opie_AC210610_10772	NA	Moderate	-0.0256544	8.12491
cinful_zeon_AC195790_4706	Retand	Old	-0.0277312	2.27713
opie_AC185480_1137	SIRE	Moderate	-0.0280941	0.991389
ebel_AC188777_2128	Ale	Young	-0.0291277	1.14088
chr2_D_48986571	SIRE	Moderate	-0.0302019	1.87121
huck_AC212331_11708	Retand	Old	-0.0331558	13.4208
ewib_AC198384_5975	NA	Old	-0.0354402	0.449172
giepum_AC211155_11010	Ale	Moderate	-0.0382982	1.03766
ansuya_AC207803_9728	CRM	Young	-0.0427491	5.63968
CRM4_7145	CRM	Old	-0.0439541	0.916755
small_AC217574_13522	Ale	Young	-0.0465009	0.471462
chr4_D_40959532	SIRE	Moderate	-0.0471157	5.28402
ji_AC186528_1508	SIRE	Young	-0.0488199	3.29506
gyma_AC189750_2238	NA	Moderate	-0.0567605	5.04829
gudyeg_AC206942_9404	TAR	Old	-0.0587153	4.25702
opie_AC202020_7258	SIRE	Moderate	-0.0659212	4.84598
huck_AC208546_9913	Retand	Old	-0.068567	4.59521
opie_AC217577_13524	SIRE	Old	-0.0865407	12.7105
gunu_AC209758_10359	SIRE	Moderate	-0.0967883	2.91059
huck_AC199418_6452	Retand	Old	-0.109081	9.03802
vegu_AC190718_85	NA	Moderate	-0.116108	2.94998
grande_AC200214_6803	Retand	Moderate	-0.130441	53.3907
dagaf_AC195302_4533	Tekay	Old	-0.135613	4.50913
huck_AC186603_1556	Retand	Old	-0.148893	22.0697
huck_AC194973_4393	Retand	Old	-0.341054	20.876
