# Supplementary material for: Differences in activity and stability drive transposable element variation in tropical and temperate maize
Source: HighWire-hosted journal article supplement (doi:10.1101/gr.278131.123), 2024-08-01
Supplement: Supplemental_Table_S3.xlsx [file Supplemental_Table_S3.xlsx]

## Sheet: Supplemental Table S3
Supplemental Table S3. The number of unmethylated intact LTR elements (only the top 20 families were shown)
Rank	LTR family	LTR clade	UM-5'LTR #
1	uwum_AC213069_12092	Tekay	3068
2	flip_AC208040_9765	Tekay	1146
3	ruda_AC202870_7495	SIRE	1011
4	guhis_AC198413_5999	CRM	820
5	flip_AC193970_3791	Tekay	749
6	CRM2_7577nt	CRM	726
7	xilon_diguus_AC203313_7774	Tekay	710
8	flip_AC194904_4319	Tekay	591
9	flip_AC211750_11412	Tekay	467
10	prem1_AC212325_11702	Tekay	436
11	chr6_P_87978263	SIRE	389
12	tekay_AC211245_11065	Tekay	321
13	prem1_AC196065_4927	Tekay	305
14	naadira_AC206864_9376	CRM	301
15	flip_AC203163_7675	Tekay	180
16	flip_AC214266_12595	Tekay	173
17	eugene_AC200048_6717	CRM	163
18	flip_AC213672_12280	Tekay	126
19	uwum_AC177933_415	NA	106
20	ji_AC215728_13156	SIRE	87
