# Supplementary material for: Differences in activity and stability drive transposable element variation in tropical and temperate maize
Source: HighWire-hosted journal article supplement (doi:10.1101/gr.278131.123), 2024-08-01
Supplement: Supplemental_Table_S4.xlsx [file Supplemental_Table_S4.xlsx]

## Sheet: Supplemental Table S4
Supplemental Table S4. Distribution of intact LTR elements in relation to genes.
A. The number and percentage of LTR elements overlapping with and outside of genes.
	Overlapping with Genes		Outside of Genes
Category	Intact LTR #	% of category	Intact LTR #	% of category
Balanced (trop < temp)	781	0.0326683	23126	0.967332
Balanced (trop > temp)	419	0.0323527	12532	0.967647
Drifting (trop < temp)	7906	0.0466802	161459	0.95332
Drifting (trop > temp)	12047	0.0374652	309505	0.962535
Other	11246	0.0936815	108799	0.906318
Temperate amplification	2333	0.528187	2084	0.471813
Temperate removal	3466	0.023353	144952	0.976647
Tropical amplification	9064	0.0202624	438267	0.979738
Tropical removal	297	0.0474668	5960	0.952533
All	47559	0.0379185	1206684	0.962082
B. The number of LTR elements overlapping with gene features.
Category	CDS	5' UTR	Intron	3' UTR
Balanced (trop < temp)	28	7	733	13
Balanced (trop > temp)	49	22	310	38
Drifting (trop < temp)	422	246	6935	303
Drifting (trop > temp)	654	280	10639	474
Other	1603	1018	7493	1132
Temperate amplification	55	18	2227	33
Temperate removal	267	65	2953	181
Tropical amplification	711	157	7822	374
Tropical removal	2	3	291	1
All	3791	1816	39403	2549
C. The percentage of LTR elements overlapping with gene features.
Category	CDS	5' UTR	Intron	3' UTR
Balanced (trop < temp)	0.0358515	0.00896287	0.93854	0.0166453
Balanced (trop > temp)	0.116945	0.052506	0.739857	0.0906921
Drifting (trop < temp)	0.0533772	0.0311156	0.877182	0.0383253
Drifting (trop > temp)	0.0542874	0.0232423	0.883124	0.0393459
Other	0.14254	0.0905211	0.666281	0.100658
Temperate amplification	0.0235748	0.00771539	0.954565	0.0141449
Temperate removal	0.077034	0.0187536	0.851991	0.0522216
Tropical amplification	0.0784422	0.0173213	0.862974	0.0412621
Tropical removal	0.00673401	0.010101	0.979798	0.003367
All	0.0797115	0.0381842	0.828508	0.0535966
D. The number and percentage of LTR elements overlapping with and outside of genes.
	Overlapping with Genes		Outside of Genes
Category	Intact LTR #	% of category	Intact LTR #	% of category	P value
Temperate removal	3466	0.023353	144952	0.976647	0.05744
Tropical amplification	9064	0.0202624	438267	0.979738
Temperate removal	3466	0.023353	144952	0.976647	< 0.00001
All other categories	44093	0.0398734	1061732	0.960127
Tropical amplification	9064	0.0202624	438267	0.979738	< 0.00001
All other categories	38495	0.0477066	768417	0.952293
