# Supplementary material for: Differences in activity and stability drive transposable element variation in tropical and temperate maize
Source: HighWire-hosted journal article supplement (doi:10.1101/gr.278131.123), 2024-08-01
Supplement: Supplemental_Table_S5.xlsx [file Supplemental_Table_S5.xlsx]

## Sheet: Supplemental Table S5
Supplemental Table S5: Genes having intact LTR retrotransposons inserted into at least one of their coding regions.
Genome	TE family	LTR clade	Supfam	Dynamic category	Protein accession	Sequence length	Method	Signature accession	Signature description	Start location	Stop location	e-value	InterPro annotations	InterPro annotations	GO annotations
M37W	ji_AC204382_8228	unknown	LTR/Ty1	Temperate removal	Zm00032ab206530	314	Pfam	PF08263	Leucine rich repeat N-terminal domain	34	66	4.1e-07	IPR013210	Leucine-rich repeat-containing N-terminal, plant-type
CML322	ji_AC204382_8228	unknown	LTR/Ty1	Temperate removal	Zm00025ab207400	314	Pfam	PF08263	Leucine rich repeat N-terminal domain	34	66	4.1e-07	IPR013210	Leucine-rich repeat-containing N-terminal, plant-type
M37W	ji_AC204382_8228	unknown	LTR/Ty1	Temperate removal	Zm00032ab206530	314	Pfam	PF13855	Leucine rich repeat	156	214	2.2e-07	IPR001611	Leucine-rich repeat
CML322	ji_AC204382_8228	unknown	LTR/Ty1	Temperate removal	Zm00025ab207400	314	Pfam	PF13855	Leucine rich repeat	156	214	2.2e-07	IPR001611	Leucine-rich repeat
P39	prem1_AC200105_6751	Tekay	LTR/Ty3	Tropical amplification	Zm00040ab237840	723	Pfam	PF08263	Leucine rich repeat N-terminal domain	35	82	1.6e-07	IPR013210	Leucine-rich repeat-containing N-terminal, plant-type
Mo18W	ji_AC204382_8228	unknown	LTR/Ty1	Temperate removal	Zm00034ab211830	207	Pfam	PF13855	Leucine rich repeat	49	107	1.1e-07	IPR001611	Leucine-rich repeat
Mo18W	chr6_P_87978263	SIRE	LTR/Ty1	Tropical amplification	Zm00034ab255810	373	Pfam	PF13855	Leucine rich repeat	119	180	8.4e-08	IPR001611	Leucine-rich repeat
CML69	chr6_P_87978263	SIRE	LTR/Ty1	Tropical amplification	Zm00020ab116920	906	Pfam	PF13855	Leucine rich repeat	516	555	4e-08	IPR001611	Leucine-rich repeat
CML69	chr6_P_87978263	SIRE	LTR/Ty1	Tropical amplification	Zm00020ab116920	906	Pfam	PF08263	Leucine rich repeat N-terminal domain	31	73	1.9e-09	IPR013210	Leucine-rich repeat-containing N-terminal, plant-type
NC350	cinful_zeon_AC206171_9091	Retand	LTR/Ty3	Temperate removal	Zm00036ab190210	485	Pfam	PF13855	Leucine rich repeat	375	435	1.8e-09	IPR001611	Leucine-rich repeat	GO:0005515
P39	prem1_AC200105_6751	Tekay	LTR/Ty3	Tropical amplification	Zm00040ab237840	723	Pfam	PF13855	Leucine rich repeat	113	173	3.2e-10	IPR001611	Leucine-rich repeat	GO:0005515
Ki11	prem1_AC196065_4927	NA	LTR/Ty3	Tropical amplification	Zm00030ab240540	103	Pfam	PF08263	Leucine rich repeat N-terminal domain	39	78	8.3e-11	IPR013210	Leucine-rich repeat-containing N-terminal, plant-type
CML322	prem1_AC196065_4927	Tekay	LTR/Ty3	Tropical amplification	Zm00025ab248490	103	Pfam	PF08263	Leucine rich repeat N-terminal domain	39	78	8.3e-11	IPR013210	Leucine-rich repeat-containing N-terminal, plant-type
CML228	prem1_AC196065_4927	NA	LTR/Ty3	Tropical amplification	Zm00022ab242350	103	Pfam	PF08263	Leucine rich repeat N-terminal domain	39	78	8.3e-11	IPR013210	Leucine-rich repeat-containing N-terminal, plant-type
CML69	prem1_AC196065_4927	Tekay	LTR/Ty3	Tropical amplification	Zm00020ab242300	103	Pfam	PF08263	Leucine rich repeat N-terminal domain	39	78	8.3e-11	IPR013210	Leucine-rich repeat-containing N-terminal, plant-type
NC350	cinful_zeon_AC206171_9091	Retand	LTR/Ty3	Temperate removal	Zm00036ab190210	485	Pfam	PF08263	Leucine rich repeat N-terminal domain	35	74	4.5e-11	IPR013210	Leucine-rich repeat-containing N-terminal, plant-type
Mo18W	doke_AC197224_5479	Retand	LTR/Ty3	Tropical amplification	Zm00034ab177340	711	Pfam	PF12854	PPR repeat	328	358	5e-07	IPR002885	Pentatricopeptide repeat
Ky21	sagyfy_AC187059_1735	Retand	LTR/Ty1	Temperate removal	Zm00031ab355870	573	Pfam	PF12854	PPR repeat	308	339	2.9e-08	IPR002885	Pentatricopeptide repeat
Ky21	sagyfy_AC187059_1735	Retand	LTR/Ty1	Temperate removal	Zm00031ab355870	573	Pfam	PF13041	PPR repeat family	420	465	3.4e-09	IPR002885	Pentatricopeptide repeat
CML103	cinful_zeon_AC207755_9705	Retand	LTR/Ty3	Temperate removal	Zm00021ab166140	257	Pfam	PF13812	Pentatricopeptide repeat domain	181	238	2.7e-09	IPR002885	Pentatricopeptide repeat
Tx303	giepum_AC197531_5634	SIRE	LTR/Ty1	Temperate removal	Zm00041ab076950	365	Pfam	PF13041	PPR repeat family	225	273	2.5e-11	IPR002885	Pentatricopeptide repeat
Oh7B	giepum_AC197531_5634	SIRE	LTR/Ty1	Temperate removal	Zm00038ab077070	266	Pfam	PF13041	PPR repeat family	126	174	1.5e-11	IPR002885	Pentatricopeptide repeat
Ki11	prem1_AC206253_9147	NA	LTR/Ty3	Tropical amplification	Zm00030ab183650	334	Pfam	PF13041	PPR repeat family	126	175	4.8e-12	IPR002885	Pentatricopeptide repeat
Mo18W	doke_AC197224_5479	Retand	LTR/Ty3	Tropical amplification	Zm00034ab177340	711	Pfam	PF13041	PPR repeat family	577	625	1.8e-15	IPR002885	Pentatricopeptide repeat
CML228	opie_AC202033_7274	SIRE	LTR/Ty1	Tropical amplification	Zm00022ab010410	168	Pfam	PF07714	Protein tyrosine kinase	3	39	1.6e-05	IPR001245	Serine-threonine/tyrosine-protein kinase, catalytic domain
B97	opie_AC202033_7274	SIRE	LTR/Ty1	Tropical amplification	Zm00018ab010800	168	Pfam	PF07714	Protein tyrosine kinase	3	39	1.6e-05	IPR001245	Serine-threonine/tyrosine-protein kinase, catalytic domain
Tzi8	opie_AC202033_7274	SIRE	LTR/Ty1	Tropical amplification	Zm00042ab010930	99	Pfam	PF07714	Protein tyrosine kinase	3	39	4.7e-06	IPR001245	Serine-threonine/tyrosine-protein kinase, catalytic domain
Tx303	opie_AC202033_7274	SIRE	LTR/Ty1	Tropical amplification	Zm00041ab011240	99	Pfam	PF07714	Protein tyrosine kinase	3	39	4.7e-06	IPR001245	Serine-threonine/tyrosine-protein kinase, catalytic domain
CML333	opie_AC202033_7274	SIRE	LTR/Ty1	Tropical amplification	Zm00026ab010500	99	Pfam	PF07714	Protein tyrosine kinase	3	39	4.7e-06	IPR001245	Serine-threonine/tyrosine-protein kinase, catalytic domain
CML322	opie_AC202033_7274	SIRE	LTR/Ty1	Tropical amplification	Zm00025ab011110	99	Pfam	PF07714	Protein tyrosine kinase	3	39	4.7e-06	IPR001245	Serine-threonine/tyrosine-protein kinase, catalytic domain
HP301	ji_AC204382_8228	unknown	LTR/Ty1	Temperate removal	Zm00027ab267570	56	Pfam	PF07714	Protein tyrosine kinase	1	52	3.9e-06	IPR001245	Serine-threonine/tyrosine-protein kinase, catalytic domain
NC358	chr6_P_87978263	SIRE	LTR/Ty1	Tropical amplification	Zm00037ab247050	140	Pfam	PF07714	Protein tyrosine kinase	6	43	1e-07	IPR001245	Serine-threonine/tyrosine-protein kinase, catalytic domain
M162W	prem1_AC206253_9147	NA	LTR/Ty3	Tropical amplification	Zm00033ab141770	235	Pfam	PF00069	Protein kinase domain	151	234	5.9e-08	IPR000719	Protein kinase domain
Ki11	prem1_AC206253_9147	NA	LTR/Ty3	Tropical amplification	Zm00030ab134810	221	Pfam	PF00069	Protein kinase domain	120	219	2.7e-08	IPR000719	Protein kinase domain	GO:0004672|GO:0005524|GO:0006468
M162W	doke_AC197224_5479	Retand	LTR/Ty3	Tropical amplification	Zm00033ab132820	169	Pfam	PF00069	Protein kinase domain	2	116	1.9e-08	IPR000719	Protein kinase domain
M37W	doke_AC197224_5479	Retand	LTR/Ty3	Tropical amplification	Zm00032ab129530	169	Pfam	PF00069	Protein kinase domain	2	116	1.9e-08	IPR000719	Protein kinase domain
CML277	prem1_AC206253_9147	NA	LTR/Ty3	Tropical amplification	Zm00024ab136700	221	Pfam	PF00069	Protein kinase domain	120	220	9.3e-09	IPR000719	Protein kinase domain
Oh43	xilon_diguus_AC203313_7774	Tekay	LTR/Ty3	Tropical amplification	Zm00039ab078530	147	Pfam	PF00069	Protein kinase domain	74	111	2.2e-09	IPR000719	Protein kinase domain	GO:0004672|GO:0005524|GO:0006468
B73	prem1_AC206253_9147	NA	LTR/Ty3	Tropical amplification	Zm00001eb134640	241	Pfam	PF00069	Protein kinase domain	132	240	5.7e-10	IPR000719	Protein kinase domain	GO:0004672|GO:0005524|GO:0006468
CML322	machiavelli_AC200490_6883	TAR	LTR/Ty1	Temperate removal	Zm00025ab226040	519	Pfam	PF00069	Protein kinase domain	404	517	9.9e-12	IPR000719	Protein kinase domain
CML247	CRM2_7577nt	CRM	LTR/Ty3	Temperate removal	Zm00023ab186380	230	Pfam	PF00069	Protein kinase domain	170	226	3.3e-14	IPR000719	Protein kinase domain
P39	ji_AC215728_13156	SIRE	LTR/Ty1	Temperate removal	Zm00040ab397520	143	Pfam	PF00069	Protein kinase domain	37	143	8.5e-15	IPR000719	Protein kinase domain	GO:0004672|GO:0005524|GO:0006468
CML333	chr6_D_62813001	SIRE	LTR/Ty1	Tropical amplification	Zm00026ab012770	156	Pfam	PF00069	Protein kinase domain	49	156	3.6e-15	IPR000719	Protein kinase domain
NC358	cinful_zeon_AC206171_9091	Retand	LTR/Ty3	Temperate removal	Zm00037ab157170	203	Pfam	PF07714	Protein tyrosine kinase	125	203	6.8e-17	IPR001245	Serine-threonine/tyrosine-protein kinase, catalytic domain
Ki3	machiavelli_AC200490_6883	TAR	LTR/Ty1	Temperate removal	Zm00029ab249520	428	Pfam	PF07714	Protein tyrosine kinase	325	428	3.5e-17	IPR001245	Serine-threonine/tyrosine-protein kinase, catalytic domain
HP301	fourf_AC202975_7570	TAR	LTR/Ty1	Tropical amplification	Zm00027ab024560	395	Pfam	PF00069	Protein kinase domain	233	342	5.9e-22	IPR000719	Protein kinase domain
Tzi8	machiavelli_AC200490_6883	TAR	LTR/Ty1	Temperate removal	Zm00042ab365950	164	Pfam	PF00069	Protein kinase domain	13	131	5.3e-23	IPR000719	Protein kinase domain
Il14H	chr6_P_87978263	SIRE	LTR/Ty1	Tropical amplification	Zm00028ab220420	239	Pfam	PF00069	Protein kinase domain	19	121	5.7e-24	IPR000719	Protein kinase domain
Oh43	CRM2_7577nt	CRM	LTR/Ty3	Temperate removal	Zm00039ab183670	553	Pfam	PF00069	Protein kinase domain	434	538	2e-29	IPR000719	Protein kinase domain	GO:0004672|GO:0005524|GO:0006468
CML103	opie_AC198924_6206	SIRE	LTR/Ty1	Tropical amplification	Zm00021ab151980	416	Pfam	PF00069	Protein kinase domain	173	310	1.7e-30	IPR000719	Protein kinase domain
B73	chr6_P_87978263	SIRE	LTR/Ty1	Tropical amplification	Zm00001eb283170	418	Pfam	PF00069	Protein kinase domain	173	310	1.7e-30	IPR000719	Protein kinase domain	GO:0004672|GO:0005524|GO:0006468
P39	prem1_AC196065_4927	NA	LTR/Ty3	Tropical amplification	Zm00040ab186000	209	Pfam	PF00069	Protein kinase domain	53	201	1.1e-30	IPR000719	Protein kinase domain	GO:0004672|GO:0005524|GO:0006468
CML277	prem1_AC206253_9147	NA	LTR/Ty3	Tropical amplification	Zm00024ab257280	621	Pfam	PF00069	Protein kinase domain	447	592	2.1e-33	IPR000719	Protein kinase domain
CML103	prem1_AC206253_9147	unknown	LTR/Ty3	Tropical amplification	Zm00021ab256650	621	Pfam	PF00069	Protein kinase domain	447	592	2.1e-33	IPR000719	Protein kinase domain
CML69	chr6_P_87978263	SIRE	LTR/Ty1	Tropical amplification	Zm00020ab116920	906	Pfam	PF00069	Protein kinase domain	659	873	2.7e-36	IPR000719	Protein kinase domain
NC350	chr6_P_87978263	SIRE	LTR/Ty1	Tropical amplification	Zm00036ab074540	304	Pfam	PF07714	Protein tyrosine kinase	99	282	2.3e-39	IPR001245	Serine-threonine/tyrosine-protein kinase, catalytic domain	GO:0004672|GO:0006468
CML69	chr6_P_87978263	SIRE	LTR/Ty1	Tropical amplification	Zm00020ab073160	350	Pfam	PF07714	Protein tyrosine kinase	145	328	2.3e-39	IPR001245	Serine-threonine/tyrosine-protein kinase, catalytic domain
Ki11	chr6_P_87978263	SIRE	LTR/Ty1	Tropical amplification	Zm00030ab071840	322	Pfam	PF07714	Protein tyrosine kinase	117	300	1.8e-39	IPR001245	Serine-threonine/tyrosine-protein kinase, catalytic domain	GO:0004672|GO:0006468
CML228	chr6_P_87978263	SIRE	LTR/Ty1	Tropical amplification	Zm00022ab072790	210	Pfam	PF07714	Protein tyrosine kinase	9	189	1.8e-39	IPR001245	Serine-threonine/tyrosine-protein kinase, catalytic domain
CML322	TE_00007661	NA	LTR/unknown	Tropical amplification	Zm00025ab403430	745	Pfam	PF07714	Protein tyrosine kinase	529	722	2.2e-45	IPR001245	Serine-threonine/tyrosine-protein kinase, catalytic domain
Ki11	cinful_zeon_AC209373_10201	Retand	LTR/Ty3	Temperate removal	Zm00030ab052590	320	Pfam	PF00069	Protein kinase domain	31	271	6.5e-47	IPR000719	Protein kinase domain	GO:0004672|GO:0005524|GO:0006468
CML277	TE_00002958	Tork	LTR/Ty1	Tropical amplification	Zm00024ab258980	506	Pfam	PF00069	Protein kinase domain	168	377	4.9e-47	IPR000719	Protein kinase domain
Ki3	xilon_diguus_AC203313_7774	Tekay	LTR/Ty3	Tropical amplification	Zm00029ab370230	687	Pfam	PF07714	Protein tyrosine kinase	347	616	1.2e-47	IPR001245	Serine-threonine/tyrosine-protein kinase, catalytic domain
CML247	xilon_diguus_AC203313_7774	Tekay	LTR/Ty3	Tropical amplification	Zm00023ab365850	417	Pfam	PF07714	Protein tyrosine kinase	77	346	3.4e-48	IPR001245	Serine-threonine/tyrosine-protein kinase, catalytic domain
Tzi8	cinful_zeon_AC207755_9705	Retand	LTR/Ty3	Temperate removal	Zm00042ab028750	782	Pfam	PF00069	Protein kinase domain	509	769	3.2e-49	IPR000719	Protein kinase domain
Oh7B	cinful_zeon_AC207755_9705	Retand	LTR/Ty3	Temperate removal	Zm00038ab029110	782	Pfam	PF00069	Protein kinase domain	509	769	3.2e-49	IPR000719	Protein kinase domain
HP301	cinful_zeon_AC207755_9705	Retand	LTR/Ty3	Temperate removal	Zm00027ab028370	782	Pfam	PF00069	Protein kinase domain	509	769	3.2e-49	IPR000719	Protein kinase domain
CML333	cinful_zeon_AC207755_9705	Retand	LTR/Ty3	Temperate removal	Zm00026ab027730	782	Pfam	PF00069	Protein kinase domain	509	769	3.2e-49	IPR000719	Protein kinase domain
Tx303	doke_AC197224_5479	Retand	LTR/Ty3	Tropical amplification	Zm00041ab348530	418	Pfam	PF00069	Protein kinase domain	118	381	1e-49	IPR000719	Protein kinase domain
Oh43	opie_AC198924_6206	SIRE	LTR/Ty1	Tropical amplification	Zm00039ab251410	465	Pfam	PF00069	Protein kinase domain	131	458	1.3e-50	IPR000719	Protein kinase domain	GO:0004672|GO:0005524|GO:0006468
CML103	sagyfy_AC187059_1735	Retand	LTR/Ty1	Temperate removal	Zm00021ab116890	718	Pfam	PF00069	Protein kinase domain	42	325	9.8e-51	IPR000719	Protein kinase domain
Ki11	cinful_zeon_AC209373_10201	Retand	LTR/Ty3	Temperate removal	Zm00030ab052620	364	Pfam	PF00069	Protein kinase domain	31	331	1.7e-55	IPR000719	Protein kinase domain	GO:0004672|GO:0005524|GO:0006468
CML228	opie_AC202033_7274	SIRE	LTR/Ty1	Tropical amplification	Zm00022ab359920	539	Pfam	PF00069	Protein kinase domain	14	266	5.2e-78	IPR000719	Protein kinase domain
NC350	chr6_P_87978263	SIRE	LTR/Ty1	Tropical amplification	Zm00036ab126820	217	Pfam	PF12776	Myb/SANT-like DNA-binding domain	1	43	5.4e-05	IPR024752	Myb/SANT-like domain
Ki3	chr6_P_87978263	SIRE	LTR/Ty1	Tropical amplification	Zm00029ab127260	217	Pfam	PF12776	Myb/SANT-like DNA-binding domain	1	43	5.4e-05	IPR024752	Myb/SANT-like domain
CML333	chr6_P_87978263	SIRE	LTR/Ty1	Tropical amplification	Zm00026ab123690	217	Pfam	PF12776	Myb/SANT-like DNA-binding domain	1	43	5.4e-05	IPR024752	Myb/SANT-like domain
CML69	chr6_P_87978263	SIRE	LTR/Ty1	Tropical amplification	Zm00020ab124320	217	Pfam	PF12776	Myb/SANT-like DNA-binding domain	1	43	5.4e-05	IPR024752	Myb/SANT-like domain
Mo18W	chr6_P_87978263	SIRE	LTR/Ty1	Tropical amplification	Zm00034ab368870	221	Pfam	PF12776	Myb/SANT-like DNA-binding domain	18	103	5.1e-08	IPR024752	Myb/SANT-like domain
Ki3	cinful_zeon_AC199790_6582	Retand	LTR/Ty3	Temperate removal	Zm00029ab121670	312	Pfam	PF12776	Myb/SANT-like DNA-binding domain	20	113	3.2e-08	IPR024752	Myb/SANT-like domain
CML247	cinful_zeon_AC199790_6582	Retand	LTR/Ty3	Temperate removal	Zm00023ab121580	312	Pfam	PF12776	Myb/SANT-like DNA-binding domain	20	113	3.2e-08	IPR024752	Myb/SANT-like domain
NC358	cinful_zeon_AC199790_6582	Retand	LTR/Ty3	Temperate removal	Zm00037ab118420	302	Pfam	PF12776	Myb/SANT-like DNA-binding domain	20	113	2.9e-08	IPR024752	Myb/SANT-like domain
HP301	cinful_zeon_AC199790_6582	Retand	LTR/Ty3	Temperate removal	Zm00027ab119040	302	Pfam	PF12776	Myb/SANT-like DNA-binding domain	20	113	2.9e-08	IPR024752	Myb/SANT-like domain
CML103	cinful_zeon_AC199790_6582	Retand	LTR/Ty3	Temperate removal	Zm00021ab118840	183	Pfam	PF12776	Myb/SANT-like DNA-binding domain	20	113	9.2e-09	IPR024752	Myb/SANT-like domain
NC358	cinful_zeon_AC206171_9091	Retand	LTR/Ty3	Temperate removal	Zm00037ab047520	168	Pfam	PF12776	Myb/SANT-like DNA-binding domain	19	113	4.3e-09	IPR024752	Myb/SANT-like domain
M162W	opie_AC202033_7274	SIRE	LTR/Ty1	Tropical amplification	Zm00033ab349850	131	Pfam	PF00612	IQ calmodulin-binding motif	56	75	0.042	IPR000048	IQ motif, EF-hand binding site
Il14H	ji_AC204382_8228	unknown	LTR/Ty1	Temperate removal	Zm00028ab222480	965	Pfam	PF00612	IQ calmodulin-binding motif	546	564	0.0051	IPR000048	IQ motif, EF-hand binding site
Il14H	xilon_diguus_AC203313_7774	Tekay	LTR/Ty3	Tropical amplification	Zm00028ab241820	173	Pfam	PF00612	IQ calmodulin-binding motif	118	135	0.0027	IPR000048	IQ motif, EF-hand binding site
Oh43	ji_AC204382_8228	unknown	LTR/Ty1	Temperate removal	Zm00039ab147110	252	Pfam	PF00612	IQ calmodulin-binding motif	14	32	0.001	IPR000048	IQ motif, EF-hand binding site	GO:0005515
Tzi8	cinful_zeon_AC206615_9266	Retand	LTR/Ty3	Tropical amplification	Zm00042ab187770	204	Pfam	PF00612	IQ calmodulin-binding motif	81	99	0.00023	IPR000048	IQ motif, EF-hand binding site
Tx303	cinful_zeon_AC206615_9266	Retand	LTR/Ty3	Tropical amplification	Zm00041ab188270	204	Pfam	PF00612	IQ calmodulin-binding motif	81	99	0.00023	IPR000048	IQ motif, EF-hand binding site
P39	cinful_zeon_AC206615_9266	Retand	LTR/Ty3	Tropical amplification	Zm00040ab193010	204	Pfam	PF00612	IQ calmodulin-binding motif	81	99	0.00023	IPR000048	IQ motif, EF-hand binding site	GO:0005515
Oh43	cinful_zeon_AC206615_9266	Retand	LTR/Ty3	Tropical amplification	Zm00039ab183210	204	Pfam	PF00612	IQ calmodulin-binding motif	81	99	0.00023	IPR000048	IQ motif, EF-hand binding site	GO:0005515
Oh7B	cinful_zeon_AC206615_9266	Retand	LTR/Ty3	Tropical amplification	Zm00038ab183530	204	Pfam	PF00612	IQ calmodulin-binding motif	81	99	0.00023	IPR000048	IQ motif, EF-hand binding site
NC358	cinful_zeon_AC206615_9266	Retand	LTR/Ty3	Tropical amplification	Zm00037ab182130	204	Pfam	PF00612	IQ calmodulin-binding motif	81	99	0.00023	IPR000048	IQ motif, EF-hand binding site
NC350	cinful_zeon_AC206615_9266	Retand	LTR/Ty3	Tropical amplification	Zm00036ab186600	204	Pfam	PF00612	IQ calmodulin-binding motif	81	99	0.00023	IPR000048	IQ motif, EF-hand binding site	GO:0005515
Mo18W	cinful_zeon_AC206615_9266	Retand	LTR/Ty3	Tropical amplification	Zm00034ab191750	204	Pfam	PF00612	IQ calmodulin-binding motif	81	99	0.00023	IPR000048	IQ motif, EF-hand binding site
M37W	cinful_zeon_AC206615_9266	Retand	LTR/Ty3	Tropical amplification	Zm00032ab186810	204	Pfam	PF00612	IQ calmodulin-binding motif	81	99	0.00023	IPR000048	IQ motif, EF-hand binding site
Ki11	cinful_zeon_AC206615_9266	Retand	LTR/Ty3	Tropical amplification	Zm00030ab181350	204	Pfam	PF00612	IQ calmodulin-binding motif	81	99	0.00023	IPR000048	IQ motif, EF-hand binding site	GO:0005515
Ki3	cinful_zeon_AC206615_9266	Retand	LTR/Ty3	Tropical amplification	Zm00029ab187300	204	Pfam	PF00612	IQ calmodulin-binding motif	81	99	0.00023	IPR000048	IQ motif, EF-hand binding site
Il14H	cinful_zeon_AC206615_9266	Retand	LTR/Ty3	Tropical amplification	Zm00028ab186270	204	Pfam	PF00612	IQ calmodulin-binding motif	81	99	0.00023	IPR000048	IQ motif, EF-hand binding site
HP301	cinful_zeon_AC206615_9266	Retand	LTR/Ty3	Tropical amplification	Zm00027ab183470	204	Pfam	PF00612	IQ calmodulin-binding motif	81	99	0.00023	IPR000048	IQ motif, EF-hand binding site
CML333	cinful_zeon_AC206615_9266	Retand	LTR/Ty3	Tropical amplification	Zm00026ab182390	204	Pfam	PF00612	IQ calmodulin-binding motif	81	99	0.00023	IPR000048	IQ motif, EF-hand binding site
CML277	cinful_zeon_AC206615_9266	Retand	LTR/Ty3	Tropical amplification	Zm00024ab184020	204	Pfam	PF00612	IQ calmodulin-binding motif	81	99	0.00023	IPR000048	IQ motif, EF-hand binding site
CML247	cinful_zeon_AC206615_9266	Retand	LTR/Ty3	Tropical amplification	Zm00023ab186000	204	Pfam	PF00612	IQ calmodulin-binding motif	81	99	0.00023	IPR000048	IQ motif, EF-hand binding site
CML228	cinful_zeon_AC206615_9266	Retand	LTR/Ty3	Tropical amplification	Zm00022ab182920	204	Pfam	PF00612	IQ calmodulin-binding motif	81	99	0.00023	IPR000048	IQ motif, EF-hand binding site
CML69	cinful_zeon_AC206615_9266	Retand	LTR/Ty3	Tropical amplification	Zm00020ab182920	204	Pfam	PF00612	IQ calmodulin-binding motif	81	99	0.00023	IPR000048	IQ motif, EF-hand binding site
B97	cinful_zeon_AC206615_9266	Retand	LTR/Ty3	Tropical amplification	Zm00018ab187700	204	Pfam	PF00612	IQ calmodulin-binding motif	81	99	0.00023	IPR000048	IQ motif, EF-hand binding site
B73	cinful_zeon_AC206615_9266	Retand	LTR/Ty3	Tropical amplification	Zm00001eb181070	204	Pfam	PF00612	IQ calmodulin-binding motif	81	99	0.00023	IPR000048	IQ motif, EF-hand binding site	GO:0005515
NC350	chr6_P_87978263	SIRE	LTR/Ty1	Tropical amplification	Zm00036ab045140	194	Pfam	PF00612	IQ calmodulin-binding motif	120	138	0.00021	IPR000048	IQ motif, EF-hand binding site	GO:0005515
CML52	cinful_zeon_AC206615_9266	Retand	LTR/Ty3	Tropical amplification	Zm00019ab170910	199	Pfam	PF00612	IQ calmodulin-binding motif	118	137	0.00018	IPR000048	IQ motif, EF-hand binding site
Tx303	chr6_P_87978263	SIRE	LTR/Ty1	Tropical amplification	Zm00041ab257300	124	Pfam	PF00612	IQ calmodulin-binding motif	14	32	0.00011	IPR000048	IQ motif, EF-hand binding site
Ky21	anysaf_AC211487_11211	Reina	LTR/Ty3	Tropical amplification	Zm00031ab185870	300	Pfam	PF00646	F-box domain	25	60	0.00029	IPR001810	F-box domain	GO:0005515
NC358	machiavelli_AC200490_6883	TAR	LTR/Ty1	Temperate removal	Zm00037ab147530	368	Pfam	PF00201	UDP-glucoronosyl and UDP-glucosyl transferase	278	364	0.00014	IPR002213	UDP-glucuronosyl/UDP-glucosyltransferase
M162W	machiavelli_AC200490_6883	TAR	LTR/Ty1	Temperate removal	Zm00033ab155160	368	Pfam	PF00201	UDP-glucoronosyl and UDP-glucosyl transferase	278	364	0.00014	IPR002213	UDP-glucuronosyl/UDP-glucosyltransferase
CML228	opie_AC202033_7274	SIRE	LTR/Ty1	Tropical amplification	Zm00022ab359920	539	Pfam	PF00627	UBA/TS-N domain	289	324	0.00012	IPR015940	Ubiquitin-associated domain
HP301	anysaf_AC211487_11211	Reina	LTR/Ty3	Tropical amplification	Zm00027ab181660	289	Pfam	PF00155	Aminotransferase class I and II	176	276	8.4e-05	IPR004839	Aminotransferase, class I/classII
CML333	anysaf_AC211487_11211	Reina	LTR/Ty3	Tropical amplification	Zm00026ab180690	289	Pfam	PF00155	Aminotransferase class I and II	176	276	8.4e-05	IPR004839	Aminotransferase, class I/classII
CML228	anysaf_AC211487_11211	Reina	LTR/Ty3	Tropical amplification	Zm00022ab181200	281	Pfam	PF00155	Aminotransferase class I and II	168	268	7.9e-05	IPR004839	Aminotransferase, class I/classII
CML69	anysaf_AC211487_11211	Reina	LTR/Ty3	Tropical amplification	Zm00020ab181270	262	Pfam	PF00155	Aminotransferase class I and II	149	249	6.8e-05	IPR004839	Aminotransferase, class I/classII
P39	TE_00002958	Tork	LTR/Ty1	Tropical amplification	Zm00040ab129190	172	Pfam	PF00400	WD domain, G-beta repeat	32	68	6.5e-05	IPR001680	WD40 repeat	GO:0005515
Tzi8	chr6_P_87978263	SIRE	LTR/Ty1	Tropical amplification	Zm00042ab390300	331	Pfam	PF00583	Acetyltransferase (GNAT) family	210	272	6.2e-05	IPR000182	GNAT domain
Oh7B	chr6_P_87978263	SIRE	LTR/Ty1	Tropical amplification	Zm00038ab404680	265	Pfam	PF08276	PAN-like domain	137	192	6.1e-05	IPR003609	PAN/Apple domain
M162W	ruda_AC195952_4839	SIRE	LTR/Ty1	Temperate removal	Zm00033ab334200	366	Pfam	PF03450	CO dehydrogenase flavoprotein C-terminal domain	292	342	6.1e-05	IPR005107	CO dehydrogenase flavoprotein, C-terminal
Oh43	xilon_diguus_AC203313_7774	Tekay	LTR/Ty3	Tropical amplification	Zm00039ab283080	263	Pfam	PF08164	Apoptosis-antagonizing transcription factor, C-terminal	227	259	5.6e-05	IPR012617	Apoptosis-antagonizing transcription factor, C-terminal	GO:0005634
CML52	xilon_diguus_AC203313_7774	Tekay	LTR/Ty3	Tropical amplification	Zm00019ab266980	263	Pfam	PF08164	Apoptosis-antagonizing transcription factor, C-terminal	227	259	5.6e-05	IPR012617	Apoptosis-antagonizing transcription factor, C-terminal
CML247	opie_AC202033_7274	SIRE	LTR/Ty1	Tropical amplification	Zm00023ab314570	489	Pfam	PF00786	P21-Rho-binding domain	70	98	5e-05	IPR000095	CRIB domain
M162W	cinful_zeon_AC186530_1513	Retand	LTR/Ty3	Tropical amplification	Zm00033ab327770	301	Pfam	PF01479	S4 domain	160	200	4.9e-05	IPR002942	RNA-binding S4 domain
NC358	anysaf_AC211487_11211	Reina	LTR/Ty3	Tropical amplification	Zm00037ab180350	270	Pfam	PF00155	Aminotransferase class I and II	168	218	4.3e-05	IPR004839	Aminotransferase, class I/classII
Oh7B	CRM2_7577nt	CRM	LTR/Ty3	Temperate removal	Zm00038ab135420	742	Pfam	PF03017	TNP1/EN/SPM transposase	417	446	3.7e-05	IPR004264	Transposase, Tnp1/En/Spm-like
NC350	cinful_zeon_AC199960_6694	Retand	LTR/Ty3	Tropical amplification	Zm00036ab056530	129	Pfam	PF00481	Protein phosphatase 2C	84	114	3.3e-05	IPR001932	PPM-type phosphatase domain	GO:0003824
Ki11	chr6_P_87978263	Reina	LTR/Ty1	Tropical amplification	Zm00030ab379750	164	Pfam	PF03478	Protein of unknown function (DUF295)	73	112	2.6e-05	IPR005174	Domain unknown function DUF295
CML322	xilon_diguus_AC203313_7774	Tekay	LTR/Ty3	Tropical amplification	Zm00025ab189650	1220	Pfam	PF00996	GDP dissociation inhibitor	31	167	2.6e-05	IPR018203	GDP dissociation inhibitor
NC358	chr6_P_87978263	SIRE	LTR/Ty1	Tropical amplification	Zm00037ab247050	140	Pfam	PF00481	Protein phosphatase 2C	91	133	1.9e-05	IPR001932	PPM-type phosphatase domain
Tzi8	xilon_diguus_AC203313_7774	Tekay	LTR/Ty3	Tropical amplification	Zm00042ab146110	639	Pfam	PF11255	Protein of unknown function (DUF3054)	603	639	1.7e-05	IPR021414	Protein of unknown function DUF3054
CML228	doke_AC197224_5479	Retand	LTR/Ty3	Tropical amplification	Zm00022ab037480	445	Pfam	PF00230	Major intrinsic protein	99	260	1.3e-05	IPR000425	Major intrinsic protein
CML333	doke_AC197224_5479	Retand	LTR/Ty3	Tropical amplification	Zm00026ab036400	399	Pfam	PF00230	Major intrinsic protein	159	319	1.2e-05	IPR000425	Major intrinsic protein
M37W	cinful_zeon_AC205031_8560	Retand	LTR/Ty3	Tropical amplification	Zm00032ab023030	351	Pfam	PF00182	Chitinase class I	1	28	1.1e-05	IPR000726	Glycoside hydrolase, family 19, catalytic
CML333	xilon_diguus_AC203313_7774	Tekay	LTR/Ty3	Tropical amplification	Zm00026ab183960	665	Pfam	PF00996	GDP dissociation inhibitor	31	167	1.1e-05	IPR018203	GDP dissociation inhibitor
CML103	cinful_zeon_AC205031_8560	Retand	LTR/Ty3	Tropical amplification	Zm00021ab022360	351	Pfam	PF00182	Chitinase class I	1	28	1.1e-05	IPR000726	Glycoside hydrolase, family 19, catalytic
Il14H	chr6_P_87978263	SIRE	LTR/Ty1	Tropical amplification	Zm00028ab111370	305	Pfam	PF07786	Protein of unknown function (DUF1624)	204	290	9.5e-06	IPR012429	Domain of unknown function DUF1624
B73	prem1_AC206253_9147	unknown	LTR/Ty3	Tropical amplification	Zm00001eb035530	573	Pfam	PF04857	CAF1 family ribonuclease	305	376	6.5e-06	IPR006941	Ribonuclease CAF1
NC350	prem1_AC196065_4927	Tekay	LTR/Ty3	Tropical amplification	Zm00036ab294890	313	Pfam	PF00153	Mitochondrial carrier protein	269	301	6.1e-06	IPR018108	Mitochondrial substrate/solute carrier
Ki3	machiavelli_AC200490_6883	TAR	LTR/Ty1	Temperate removal	Zm00029ab105140	110	Pfam	PF00201	UDP-glucoronosyl and UDP-glucosyl transferase	2	41	6e-06	IPR002213	UDP-glucuronosyl/UDP-glucosyltransferase
Ky21	chr6_P_87978263	SIRE	LTR/Ty1	Tropical amplification	Zm00031ab057300	552	Pfam	PF02928	C5HC2 zinc finger	18	49	4.4e-06	IPR004198	Zinc finger, C5HC2-type
CML69	doke_AC197224_5479	Retand	LTR/Ty3	Tropical amplification	Zm00020ab223430	221	Pfam	PF08387	FBD	59	96	4.3e-06	IPR006566	FBD domain
CML333	chr6_P_87978263	SIRE	LTR/Ty1	Tropical amplification	Zm00026ab376250	288	Pfam	PF00583	Acetyltransferase (GNAT) family	165	229	3.9e-06	IPR000182	GNAT domain
Oh7B	chr6_D_62813001	SIRE	LTR/Ty1	Tropical amplification	Zm00038ab135350	116	Pfam	PF02841	Guanylate-binding protein, C-terminal domain	67	116	3.7e-06	IPR003191	Guanylate-binding protein/Atlastin, C-terminal
B73	xilon_diguus_AC203313_7774	Tekay	LTR/Ty3	Tropical amplification	Zm00001eb141580	751	Pfam	PF11255	Protein of unknown function (DUF3054)	615	677	3.6e-06	IPR021414	Protein of unknown function DUF3054
Ky21	ji_AC204382_8228	unknown	LTR/Ty1	Temperate removal	Zm00031ab379960	233	Pfam	PF07719	Tetratricopeptide repeat	137	169	3.3e-06	IPR013105	Tetratricopeptide repeat 2
CML103	xilon_diguus_AC203313_7774	Tekay	LTR/Ty3	Tropical amplification	Zm00021ab199490	235	Pfam	PF00276	Ribosomal protein L23	3	41	3.3e-06	IPR013025	Ribosomal protein L25/L23
Ki3	chr6_P_87978263	SIRE	LTR/Ty1	Tropical amplification	Zm00029ab389150	252	Pfam	PF00583	Acetyltransferase (GNAT) family	166	229	3.1e-06	IPR000182	GNAT domain
CML52	ji_AC200613_6936	SIRE	LTR/Ty1	Tropical amplification	Zm00019ab160010	86	Pfam	PF05726	Pirin C-terminal cupin domain	48	82	3.1e-06	IPR008778	Pirin, C-terminal domain
Il14H	doke_AC197224_5479	Retand	LTR/Ty3	Tropical amplification	Zm00028ab296750	358	Pfam	PF00249	Myb-like DNA-binding domain	114	176	2.8e-06	IPR001005	SANT/Myb domain
Ky21	cinful_zeon_AC209373_10201	Retand	LTR/Ty3	Temperate removal	Zm00031ab100720	241	Pfam	PF00786	P21-Rho-binding domain	28	70	2.5e-06	IPR000095	CRIB domain
CML103	xilon_diguus_AC203313_7774	Tekay	LTR/Ty3	Tropical amplification	Zm00021ab199490	235	Pfam	PF00137	ATP synthase subunit C	42	94	2.4e-06	IPR002379	V-ATPase proteolipid subunit C-like domain
CML333	cinful_zeon_AC206171_9091	Retand	LTR/Ty3	Temperate removal	Zm00026ab273130	197	Pfam	PF13519	von Willebrand factor type A domain	79	187	2.3e-06	IPR002035	von Willebrand factor, type A
Ki3	machiavelli_AC200490_6883	TAR	LTR/Ty1	Temperate removal	Zm00029ab249520	428	Pfam	PF13947	Wall-associated receptor kinase galacturonan-binding	34	136	2e-06	IPR025287	Wall-associated receptor kinase, galacturonan-binding domain
CML228	prem1_AC206253_9147	NA	LTR/Ty3	Tropical amplification	Zm00022ab100250	341	Pfam	PF01781	Ribosomal L38e protein family	246	274	2e-06	IPR002675	Ribosomal protein L38e
CML52	cinful_zeon_AC209373_10201	Retand	LTR/Ty3	Temperate removal	Zm00019ab149470	231	Pfam	PF18151	Domain of unknown function (DUF5601)	177	225	1.9e-06	IPR041545	RABX5, catalytic core helical domain
Il14H	doke_AC197224_5479	Retand	LTR/Ty3	Tropical amplification	Zm00028ab296750	358	Pfam	PF14303	No apical meristem-associated C-terminal domain	218	298	1.8e-06	IPR029466	No apical meristem-associated, C-terminal domain
NC350	xilon_diguus_AC203313_7774	Tekay	LTR/Ty3	Tropical amplification	Zm00036ab240590	239	Pfam	PF03765	CRAL/TRIO, N-terminal domain	98	121	1.7e-06	IPR011074	CRAL/TRIO, N-terminal domain
Ki3	prem1_AC206253_9147	NA	LTR/Ty3	Tropical amplification	Zm00029ab033390	787	Pfam	PF01918	Alba	188	237	1.6e-06	IPR002775	DNA/RNA-binding protein Alba-like
Il14H	chr6_P_87978263	SIRE	LTR/Ty1	Tropical amplification	Zm00028ab342500	167	Pfam	PF06886	Targeting protein for Xklp2 (TPX2)	3	25	1.5e-06	IPR027329	TPX2, C-terminal
B73	xilon_diguus_AC203313_7774	Tekay	LTR/Ty3	Tropical amplification	Zm00001eb179030	317	Pfam	PF14226	non-haem dioxygenase in morphine synthesis N-terminal	5	81	1.5e-06	IPR026992	Non-haem dioxygenase N-terminal domain
NC350	flip_AC194904_4319	Tekay	LTR/Ty3	Tropical amplification	Zm00036ab100520	136	Pfam	PF03765	CRAL/TRIO, N-terminal domain	8	31	1.2e-06	IPR011074	CRAL/TRIO, N-terminal domain
Il14H	anysaf_AC211487_11211	Reina	LTR/Ty3	Tropical amplification	Zm00028ab184440	278	Pfam	PF00155	Aminotransferase class I and II	160	265	1.2e-06	IPR004839	Aminotransferase, class I/classII
M162W	chr6_P_87978263	SIRE	LTR/Ty1	Tropical amplification	Zm00033ab389640	935	Pfam	PF14111	Domain of unknown function (DUF4283)	447	572	1.1e-06	IPR025558	Domain of unknown function DUF4283
HP301	opie_AC202033_7274	SIRE	LTR/Ty1	Tropical amplification	Zm00027ab130640	160	Pfam	PF00481	Protein phosphatase 2C	12	48	1.1e-06	IPR001932	PPM-type phosphatase domain
P39	chr6_P_87978263	SIRE	LTR/Ty1	Tropical amplification	Zm00040ab391900	898	Pfam	PF14111	Domain of unknown function (DUF4283)	447	572	1e-06	IPR025558	Domain of unknown function DUF4283
P39	anysaf_AC211487_11211	Reina	LTR/Ty3	Tropical amplification	Zm00040ab191130	259	Pfam	PF00155	Aminotransferase class I and II	141	246	1e-06	IPR004839	Aminotransferase, class I/classII	GO:0009058|GO:0030170
Oh7B	prem1_AC200105_6751	Tekay	LTR/Ty3	Tropical amplification	Zm00038ab259980	176	Pfam	PF02536	mTERF	65	175	9.9e-07	IPR003690	Transcription termination factor, mitochondrial/chloroplastic
NC358	ji_AC204382_8228	unknown	LTR/Ty1	Temperate removal	Zm00037ab157180	294	Pfam	PF13947	Wall-associated receptor kinase galacturonan-binding	44	133	9.7e-07	IPR025287	Wall-associated receptor kinase, galacturonan-binding domain
Tzi8	CRM2_7577nt	CRM	LTR/Ty3	Temperate removal	Zm00042ab089030	348	Pfam	PF01412	Putative GTPase activating protein for Arf	263	330	8.4e-07	IPR001164	Arf GTPase activating protein
CML247	CRM2_7577nt	CRM	LTR/Ty3	Temperate removal	Zm00023ab089780	348	Pfam	PF01412	Putative GTPase activating protein for Arf	263	330	8.4e-07	IPR001164	Arf GTPase activating protein
CML322	machiavelli_AC200490_6883	TAR	LTR/Ty1	Temperate removal	Zm00025ab226040	519	Pfam	PF13236	Clustered mitochondria	33	74	8.2e-07	IPR025697	CLU domain
M37W	prem1_AC206253_9147	unknown	LTR/Ty3	Tropical amplification	Zm00032ab026890	211	Pfam	PF01956	Integral membrane protein EMC3/TMCO1-like	34	69	7.4e-07	IPR002809	Integral membrane protein EMC3/TMCO1-like
Oh43	CRM2_7577nt	CRM	LTR/Ty3	Temperate removal	Zm00039ab087920	314	Pfam	PF01412	Putative GTPase activating protein for Arf	229	296	7.1e-07	IPR001164	Arf GTPase activating protein	GO:0005096
HP301	donuil_AC196196_5026	Ikeros	LTR/Ty1	Tropical amplification	Zm00027ab133060	178	Pfam	PF01657	Salt stress response/antifungal	59	101	6.1e-07	IPR002902	Gnk2-homologous domain
CML69	chr6_P_87978263	SIRE	LTR/Ty1	Tropical amplification	Zm00020ab108850	236	Pfam	PF00462	Glutaredoxin	81	129	4.3e-07	IPR002109	Glutaredoxin
M162W	ji_AC215728_13156	SIRE	LTR/Ty1	Temperate removal	Zm00033ab055520	239	Pfam	PF00170	bZIP transcription factor	206	231	4.2e-07	IPR004827	Basic-leucine zipper domain
Ky21	chr6_P_87978263	SIRE	LTR/Ty1	Tropical amplification	Zm00031ab057300	552	Pfam	PF08429	PLU-1-like protein	132	346	3.9e-07	IPR013637	Lysine-specific demethylase-like domain
Tzi8	ji_AC215728_13156	SIRE	LTR/Ty1	Temperate removal	Zm00042ab054110	209	Pfam	PF00170	bZIP transcription factor	176	201	3.5e-07	IPR004827	Basic-leucine zipper domain
P39	chr6_P_87978263	SIRE	LTR/Ty1	Tropical amplification	Zm00040ab246630	372	Pfam	PF00012	Hsp70 protein	61	161	3.4e-07	IPR013126	Heat shock protein 70 family
NC358	ji_AC204382_8228	unknown	LTR/Ty1	Temperate removal	Zm00037ab096660	291	Pfam	PF08541	3-Oxoacyl-[acyl-carrier-protein (ACP)] synthase III C terminal	177	257	2.8e-07	IPR013747	3-Oxoacyl-[acyl-carrier-protein (ACP)] synthase III, C-terminal
P39	xilon_diguus_AC203313_7774	Tekay	LTR/Ty3	Tropical amplification	Zm00040ab299080	243	Pfam	PF00170	bZIP transcription factor	110	163	2.7e-07	IPR004827	Basic-leucine zipper domain	GO:0003700|GO:0006355
Ki11	xilon_diguus_AC203313_7774	Tekay	LTR/Ty3	Tropical amplification	Zm00030ab365660	304	Pfam	PF13410	Glutathione S-transferase, C-terminal domain	199	269	2.3e-07
Oh7B	cinful_zeon_AC207755_9705	Retand	LTR/Ty3	Temperate removal	Zm00038ab342550	187	Pfam	PF13947	Wall-associated receptor kinase galacturonan-binding	45	160	2e-07	IPR025287	Wall-associated receptor kinase, galacturonan-binding domain
CML103	chr6_P_87978263	SIRE	LTR/Ty1	Tropical amplification	Zm00021ab213630	370	Pfam	PF00076	RNA recognition motif. (a.k.a. RRM, RBD, or RNP domain)	33	96	1.6e-07	IPR000504	RNA recognition motif domain
Tzi8	TE_00002958	Tork	LTR/Ty1	Tropical amplification	Zm00042ab296040	1107	Pfam	PF12796	Ankyrin repeats (3 copies)	634	689	1.3e-07	IPR020683	Ankyrin repeat-containing domain
CML333	cinful_zeon_AC201757_7049	Retand	LTR/Ty3	Tropical amplification	Zm00026ab142020	89	Pfam	PF00756	Putative esterase	25	65	1.1e-07	IPR000801	Putative esterase
CML322	cinful_zeon_AC201757_7049	Retand	LTR/Ty3	Tropical amplification	Zm00025ab146900	89	Pfam	PF00756	Putative esterase	25	65	1.1e-07	IPR000801	Putative esterase
CML247	cinful_zeon_AC201757_7049	Retand	LTR/Ty3	Tropical amplification	Zm00023ab145540	89	Pfam	PF00756	Putative esterase	25	65	1.1e-07	IPR000801	Putative esterase
Tzi8	cinful_zeon_AC201757_7049	Retand	LTR/Ty3	Tropical amplification	Zm00042ab146130	85	Pfam	PF00756	Putative esterase	25	65	1e-07	IPR000801	Putative esterase
Tx303	cinful_zeon_AC201757_7049	Retand	LTR/Ty3	Tropical amplification	Zm00041ab147440	85	Pfam	PF00756	Putative esterase	25	65	1e-07	IPR000801	Putative esterase
Oh7B	cinful_zeon_AC201757_7049	Retand	LTR/Ty3	Tropical amplification	Zm00038ab144510	85	Pfam	PF00756	Putative esterase	25	65	1e-07	IPR000801	Putative esterase
NC358	cinful_zeon_AC201757_7049	Retand	LTR/Ty3	Tropical amplification	Zm00037ab142310	85	Pfam	PF00756	Putative esterase	25	65	1e-07	IPR000801	Putative esterase
NC350	cinful_zeon_AC201757_7049	Retand	LTR/Ty3	Tropical amplification	Zm00036ab145610	85	Pfam	PF00756	Putative esterase	25	65	1e-07	IPR000801	Putative esterase
Mo18W	cinful_zeon_AC201757_7049	Retand	LTR/Ty3	Tropical amplification	Zm00034ab150800	85	Pfam	PF00756	Putative esterase	25	65	1e-07	IPR000801	Putative esterase
Ki11	cinful_zeon_AC201757_7049	Retand	LTR/Ty3	Tropical amplification	Zm00030ab141630	85	Pfam	PF00756	Putative esterase	25	65	1e-07	IPR000801	Putative esterase
CML103	cinful_zeon_AC201757_7049	Retand	LTR/Ty3	Tropical amplification	Zm00021ab142610	85	Pfam	PF00756	Putative esterase	25	65	1e-07	IPR000801	Putative esterase
CML69	cinful_zeon_AC201757_7049	Retand	LTR/Ty3	Tropical amplification	Zm00020ab142970	85	Pfam	PF00756	Putative esterase	25	65	1e-07	IPR000801	Putative esterase
B73	cinful_zeon_AC201757_7049	Retand	LTR/Ty3	Tropical amplification	Zm00001eb141600	85	Pfam	PF00756	Putative esterase	25	65	1e-07	IPR000801	Putative esterase
Ki11	xilon_diguus_AC203313_7774	Tekay	LTR/Ty3	Tropical amplification	Zm00030ab357600	752	Pfam	PF01657	Salt stress response/antifungal	169	255	9.1e-08	IPR002902	Gnk2-homologous domain
M162W	opie_AC198924_6206	SIRE	LTR/Ty1	Tropical amplification	Zm00033ab038460	341	Pfam	PF02190	ATP-dependent protease La (LON) substrate-binding domain	170	228	8e-08	IPR003111	Lon, substrate-binding domain
HP301	cinful_zeon_AC209373_10201	Retand	LTR/Ty3	Temperate removal	Zm00027ab393150	453	Pfam	PF13639	Ring finger domain	405	447	6.5e-08	IPR001841	Zinc finger, RING-type
Tx303	chr6_P_87978263	SIRE	LTR/Ty1	Tropical amplification	Zm00041ab250490	128	Pfam	PF07797	Protein of unknown function (DUF1639)	1	25	6.4e-08	IPR012438	Protein of unknown function DUF1639
NC358	chr6_P_87978263	SIRE	LTR/Ty1	Tropical amplification	Zm00037ab243090	128	Pfam	PF07797	Protein of unknown function (DUF1639)	1	25	6.4e-08	IPR012438	Protein of unknown function DUF1639
CML322	chr6_P_87978263	SIRE	LTR/Ty1	Tropical amplification	Zm00025ab249770	128	Pfam	PF07797	Protein of unknown function (DUF1639)	1	25	6.4e-08	IPR012438	Protein of unknown function DUF1639
CML247	chr6_P_87978263	SIRE	LTR/Ty1	Tropical amplification	Zm00023ab247490	128	Pfam	PF07797	Protein of unknown function (DUF1639)	1	25	6.4e-08	IPR012438	Protein of unknown function DUF1639
B97	chr6_P_87978263	SIRE	LTR/Ty1	Tropical amplification	Zm00018ab249940	128	Pfam	PF07797	Protein of unknown function (DUF1639)	1	25	6.4e-08	IPR012438	Protein of unknown function DUF1639
CML333	prem1_AC206253_9147	unknown	LTR/Ty3	Tropical amplification	Zm00026ab035100	623	Pfam	PF04857	CAF1 family ribonuclease	357	426	6.2e-08	IPR006941	Ribonuclease CAF1
M162W	prem1_AC206253_9147	NA	LTR/Ty3	Tropical amplification	Zm00033ab154340	253	Pfam	PF03031	NLI interacting factor-like phosphatase	50	98	5.4e-08	IPR004274	FCP1 homology domain
CML333	chr6_P_87978263	SIRE	LTR/Ty1	Tropical amplification	Zm00026ab337330	378	Pfam	PF06886	Targeting protein for Xklp2 (TPX2)	123	153	5.2e-08	IPR027329	TPX2, C-terminal
B97	liove_AC207121_9462	Retand	LTR/Ty3	Tropical amplification	Zm00018ab114740	132	Pfam	PF00628	PHD-finger	15	57	4.6e-08	IPR019787	Zinc finger, PHD-finger
CML228	cinful_zeon_AC206171_9091	Retand	LTR/Ty3	Temperate removal	Zm00022ab227610	236	Pfam	PF18052	Rx N-terminal domain	12	95	3.8e-08	IPR041118	Rx, N-terminal
Ki3	CRM2_7577nt	CRM	LTR/Ty3	Temperate removal	Zm00029ab338360	754	Pfam	PF00004	ATPase family associated with various cellular activities (AAA)	276	339	1.7e-08	IPR003959	ATPase, AAA-type, core
CML322	CRM2_7577nt	CRM	LTR/Ty3	Temperate removal	Zm00025ab335150	754	Pfam	PF00004	ATPase family associated with various cellular activities (AAA)	276	339	1.7e-08	IPR003959	ATPase, AAA-type, core
P39	chr6_P_87978263	SIRE	LTR/Ty1	Tropical amplification	Zm00040ab142460	330	Pfam	PF01979	Amidohydrolase family	60	210	1.6e-08	IPR006680	Amidohydrolase-related	GO:0016787
Tx303	prem1_AC212325_11702	Tekay	LTR/Ty3	Tropical amplification	Zm00041ab279750	259	Pfam	PF14700	DNA-directed RNA polymerase N-terminal	11	60	1.3e-08	IPR029262	DNA-directed RNA polymerase, N-terminal
Ki3	CRM2_7577nt	CRM	LTR/Ty3	Temperate removal	Zm00029ab196910	380	Pfam	PF17123	RING-like zinc finger	312	340	1.1e-08	IPR001841	Zinc finger, RING-type
CML228	xilon_diguus_AC203313_7774	Tekay	LTR/Ty3	Tropical amplification	Zm00022ab172050	498	Pfam	PF03004	Plant transposase (Ptta/En/Spm family)	320	371	1.1e-08	IPR004252	Probable transposase, Ptta/En/Spm, plant
NC358	giepum_AC197531_5634	SIRE	LTR/Ty1	Temperate removal	Zm00037ab106010	122	Pfam	PF16487	Mid domain of argonaute	33	86	1e-08	IPR032473	Protein argonaute, Mid domain
CML333	CRM2_7577nt	CRM	LTR/Ty3	Temperate removal	Zm00026ab087660	270	Pfam	PF16746	BAR domain of APPL family	225	269	8.4e-09
CML333	chr6_P_87978263	SIRE	LTR/Ty1	Tropical amplification	Zm00026ab375430	210	Pfam	PF08241	Methyltransferase domain	20	74	7e-09	IPR013216	Methyltransferase type 11
CML52	xilon_diguus_AC203313_7774	Tekay	LTR/Ty3	Tropical amplification	Zm00019ab222030	163	Pfam	PF16746	BAR domain of APPL family	37	94	4.7e-09
Ki3	flip_AC211750_11412	Tekay	LTR/Ty3	Tropical amplification	Zm00029ab088490	113	Pfam	PF00903	Glyoxalase/Bleomycin resistance protein/Dioxygenase superfamily	18	95	4e-09	IPR004360	Glyoxalase/fosfomycin resistance/dioxygenase domain
HP301	prem1_AC206253_9147	unknown	LTR/Ty3	Tropical amplification	Zm00027ab147830	183	Pfam	PF03031	NLI interacting factor-like phosphatase	49	100	3.6e-09	IPR004274	FCP1 homology domain
CML228	chr6_P_87978263	SIRE	LTR/Ty1	Tropical amplification	Zm00022ab121880	228	Pfam	PF02450	Lecithin:cholesterol acyltransferase	75	151	3.4e-09	IPR003386	Lecithin:cholesterol/phospholipid:diacylglycerol acyltransferase
CML322	prem1_AC212325_11702	Tekay	LTR/Ty3	Tropical amplification	Zm00025ab207430	250	Pfam	PF02365	No apical meristem (NAM) protein	101	162	3.1e-09	IPR003441	NAC domain
Oh7B	chr6_P_87978263	SIRE	LTR/Ty1	Tropical amplification	Zm00038ab203040	183	Pfam	PF02365	No apical meristem (NAM) protein	39	95	2.4e-09	IPR003441	NAC domain
CML52	chr6_P_87978263	SIRE	LTR/Ty1	Tropical amplification	Zm00019ab359810	120	Pfam	PF08241	Methyltransferase domain	18	74	2e-09	IPR013216	Methyltransferase type 11
P39	CRM2_7577nt	CRM	LTR/Ty3	Temperate removal	Zm00040ab185150	371	Pfam	PF08646	Replication factor-A C terminal domain	30	126	1.8e-09	IPR013955	Replication factor A, C-terminal
HP301	peeve_AC209948_10499	Retand	LTR/Ty3	Tropical amplification	Zm00027ab139440	431	Pfam	PF12274	Protein of unknown function (DUF3615)	340	398	1.8e-09	IPR022059	Protein of unknown function DUF3615
Ki3	flip_AC208040_9765	Tekay	LTR/Ty3	Tropical amplification	Zm00029ab326570	255	Pfam	PF16486	N-terminal domain of argonaute	45	100	1e-09	IPR032474	Protein argonaute, N-terminal
CML277	chr6_P_87978263	SIRE	LTR/Ty1	Tropical amplification	Zm00024ab029790	617	Pfam	PF14111	Domain of unknown function (DUF4283)	218	348	9.3e-10	IPR025558	Domain of unknown function DUF4283
Mo18W	CRM2_7577nt	CRM	LTR/Ty3	Temperate removal	Zm00034ab092570	374	Pfam	PF16746	BAR domain of APPL family	248	296	7.5e-10
Oh7B	xilon_diguus_AC203313_7774	Tekay	LTR/Ty3	Tropical amplification	Zm00038ab390540	725	Pfam	PF02535	ZIP Zinc transporter	42	118	7.2e-10	IPR003689	Zinc/iron permease
M37W	CRM2_7577nt	CRM	LTR/Ty3	Temperate removal	Zm00032ab090520	351	Pfam	PF16746	BAR domain of APPL family	225	273	6.9e-10
P39	chr6_P_87978263	SIRE	LTR/Ty1	Tropical amplification	Zm00040ab246630	372	Pfam	PF03360	Glycosyltransferase family 43	301	347	6.8e-10	IPR005027	Glycosyl transferase, family 43	GO:0015018|GO:0016020
Tzi8	milt_AC198975_6250	Ogre	LTR/Ty3	Temperate removal	Zm00042ab070840	144	Pfam	PF01453	D-mannose binding lectin	69	114	5.6e-10	IPR001480	Bulb-type lectin domain
Tzi8	CRM2_7577nt	CRM	LTR/Ty3	Temperate removal	Zm00042ab089030	348	Pfam	PF16746	BAR domain of APPL family	225	279	5.5e-10
CML247	CRM2_7577nt	CRM	LTR/Ty3	Temperate removal	Zm00023ab089780	348	Pfam	PF16746	BAR domain of APPL family	225	279	5.5e-10
Oh7B	xilon_diguus_AC203313_7774	Tekay	LTR/Ty3	Tropical amplification	Zm00038ab404320	395	Pfam	PF00564	PB1 domain	248	316	4.6e-10	IPR000270	PB1 domain
Ki3	xilon_diguus_AC203313_7774	Tekay	LTR/Ty3	Tropical amplification	Zm00029ab370230	687	Pfam	PF01657	Salt stress response/antifungal	169	256	3.9e-10	IPR002902	Gnk2-homologous domain
Ki3	fourf_AC202975_7570	TAR	LTR/Ty1	Tropical amplification	Zm00029ab052310	250	Pfam	PF12706	Beta-lactamase superfamily domain	144	226	3.6e-10	IPR001279	Metallo-beta-lactamase
CML333	ji_AC215728_13156	SIRE	LTR/Ty1	Temperate removal	Zm00026ab256820	175	Pfam	PF17123	RING-like zinc finger	133	161	3.4e-10	IPR001841	Zinc finger, RING-type
CML228	doke_AC197224_5479	Retand	LTR/Ty3	Tropical amplification	Zm00022ab037480	445	Pfam	PF06136	Domain of unknown function (DUF966)	284	314	3.4e-10	IPR010369	Protein of unknown function DUF966
NC350	xilon_diguus_AC203313_7774	Tekay	LTR/Ty3	Tropical amplification	Zm00036ab398180	322	Pfam	PF00564	PB1 domain	175	243	3.3e-10	IPR000270	PB1 domain	GO:0005515
B97	prem1_AC212325_11702	Tekay	LTR/Ty3	Tropical amplification	Zm00018ab217840	586	Pfam	PF14111	Domain of unknown function (DUF4283)	115	237	2.9e-10	IPR025558	Domain of unknown function DUF4283
CML247	xilon_diguus_AC203313_7774	Tekay	LTR/Ty3	Tropical amplification	Zm00023ab310590	413	Pfam	PF01762	Galactosyltransferase	213	307	2.8e-10	IPR002659	Glycosyl transferase, family 31
Oh7B	chr6_P_87978263	SIRE	LTR/Ty1	Tropical amplification	Zm00038ab006920	188	Pfam	PF11443	Domain of unknown function (DUF2828)	140	173	2.1e-10	IPR011205	Uncharacterised conserved protein UCP015417, vWA
CML247	chr6_P_87978263	SIRE	LTR/Ty1	Tropical amplification	Zm00023ab334120	488	Pfam	PF14111	Domain of unknown function (DUF4283)	187	309	2.1e-10	IPR025558	Domain of unknown function DUF4283
Il14H	prem1_AC206253_9147	Tekay	LTR/Ty3	Tropical amplification	Zm00028ab307030	632	Pfam	PF02681	Divergent PAP2 family	420	467	1.7e-10	IPR003832	Protein of unknown function DUF212
CML333	xilon_diguus_AC203313_7774	Tekay	LTR/Ty3	Tropical amplification	Zm00026ab389990	231	Pfam	PF00564	PB1 domain	84	152	1.7e-10	IPR000270	PB1 domain
CML228	xilon_diguus_AC203313_7774	Tekay	LTR/Ty3	Tropical amplification	Zm00022ab392850	231	Pfam	PF00564	PB1 domain	84	152	1.7e-10	IPR000270	PB1 domain
NC350	xilon_diguus_AC203313_7774	Tekay	LTR/Ty3	Tropical amplification	Zm00036ab321330	715	Pfam	PF03094	Mlo family	32	84	1.6e-10	IPR004326	Mlo-related protein	GO:0006952|GO:0016021
CML69	xilon_diguus_AC203313_7774	Tekay	LTR/Ty3	Tropical amplification	Zm00020ab393090	223	Pfam	PF00564	PB1 domain	75	144	1.6e-10	IPR000270	PB1 domain
M162W	cinful_zeon_AC186530_1513	Retand	LTR/Ty3	Tropical amplification	Zm00033ab327770	301	Pfam	PF12076	WAX2 C-terminal domain	49	106	1.5e-10	IPR021940	Uncharacterised domain Wax2, C-terminal
CML322	doke_AC197224_5479	Retand	LTR/Ty3	Tropical amplification	Zm00025ab038490	420	Pfam	PF06136	Domain of unknown function (DUF966)	364	395	1.5e-10	IPR010369	Protein of unknown function DUF966
CML333	doke_AC197224_5479	Retand	LTR/Ty3	Tropical amplification	Zm00026ab036400	399	Pfam	PF06136	Domain of unknown function (DUF966)	343	374	1.4e-10	IPR010369	Protein of unknown function DUF966
Tzi8	flip_AC208040_9765	Tekay	LTR/Ty3	Tropical amplification	Zm00042ab398080	448	Pfam	PF01282	Ribosomal protein S24e	339	390	1.3e-10	IPR001976	Ribosomal protein S24e
Ky21	xilon_diguus_AC203313_7774	Tekay	LTR/Ty3	Tropical amplification	Zm00031ab103770	351	Pfam	PF00249	Myb-like DNA-binding domain	69	111	1.1e-10	IPR001005	SANT/Myb domain
P39	cinful_zeon_AC186530_1513	Retand	LTR/Ty3	Tropical amplification	Zm00040ab361030	315	Pfam	PF00179	Ubiquitin-conjugating enzyme	171	232	1e-10	IPR000608	Ubiquitin-conjugating enzyme E2
Oh7B	doke_AC197224_5479	Retand	LTR/Ty3	Tropical amplification	Zm00038ab038120	323	Pfam	PF06136	Domain of unknown function (DUF966)	267	298	1e-10	IPR010369	Protein of unknown function DUF966
NC350	doke_AC197224_5479	Retand	LTR/Ty3	Tropical amplification	Zm00036ab037810	319	Pfam	PF06136	Domain of unknown function (DUF966)	263	294	1e-10	IPR010369	Protein of unknown function DUF966
Ki11	CRM2_7577nt	CRM	LTR/Ty3	Temperate removal	Zm00030ab086920	338	Pfam	PF16746	BAR domain of APPL family	173	239	9.8e-11
M162W	xilon_diguus_AC203313_7774	Tekay	LTR/Ty3	Tropical amplification	Zm00033ab150800	117	Pfam	PF00281	Ribosomal protein L5	75	114	7.8e-11	IPR031310	Ribosomal protein L5, N-terminal
NC350	xilon_diguus_AC203313_7774	Tekay	LTR/Ty3	Tropical amplification	Zm00036ab294250	498	Pfam	PF12076	WAX2 C-terminal domain	59	116	7.5e-11	IPR021940	Uncharacterised domain Wax2, C-terminal
CML52	xilon_diguus_AC203313_7774	Tekay	LTR/Ty3	Tropical amplification	Zm00019ab273460	492	Pfam	PF12076	WAX2 C-terminal domain	58	115	7.4e-11	IPR021940	Uncharacterised domain Wax2, C-terminal
Oh43	CRM2_7577nt	CRM	LTR/Ty3	Temperate removal	Zm00039ab087920	314	Pfam	PF16746	BAR domain of APPL family	173	245	7.1e-11
CML322	chr6_P_87978263	SIRE	LTR/Ty1	Tropical amplification	Zm00025ab073820	145	Pfam	PF03725	3' exoribonuclease family, domain 2	74	139	6.1e-11	IPR015847	Exoribonuclease, phosphorolytic domain 2
CML69	prem1_AC206253_9147	NA	LTR/Ty3	Tropical amplification	Zm00020ab087160	334	Pfam	PF00406	Adenylate kinase	21	70	5.3e-11
CML322	ji_AC215728_13156	SIRE	LTR/Ty1	Temperate removal	Zm00025ab400110	644	Pfam	PF00561	alpha/beta hydrolase fold	356	517	4.9e-11	IPR000073	Alpha/beta hydrolase fold-1
CML277	xilon_diguus_AC203313_7774	Tekay	LTR/Ty3	Tropical amplification	Zm00024ab185080	819	Pfam	PF05577	Serine carboxypeptidase S28	65	194	4.1e-11	IPR008758	Peptidase S28
CML103	xilon_diguus_AC203313_7774	Tekay	LTR/Ty3	Tropical amplification	Zm00021ab140080	571	Pfam	PF01918	Alba	213	254	3.4e-11	IPR002775	DNA/RNA-binding protein Alba-like
CML69	chr6_P_87978263	SIRE	LTR/Ty1	Tropical amplification	Zm00020ab029460	591	Pfam	PF14111	Domain of unknown function (DUF4283)	218	348	3e-11	IPR025558	Domain of unknown function DUF4283
CML103	cinful_zeon_AC201757_7049	Retand	LTR/Ty3	Tropical amplification	Zm00021ab244320	217	Pfam	PF01459	Eukaryotic porin	2	59	2.4e-11	IPR027246	Eukaryotic porin/Tom40
CML228	prem1_AC196065_4927	NA	LTR/Ty3	Tropical amplification	Zm00022ab247380	367	Pfam	PF10607	CTLH/CRA C-terminal to LisH motif domain	269	359	2.2e-11	IPR024964	CTLH/CRA C-terminal to LisH motif domain
P39	cinful_zeon_AC201757_7049	Retand	LTR/Ty3	Tropical amplification	Zm00040ab257240	183	Pfam	PF01459	Eukaryotic porin	2	59	1.7e-11	IPR027246	Eukaryotic porin/Tom40	GO:0005741|GO:0055085
CML277	milt_AC198975_6250	Ogre	LTR/Ty3	Temperate removal	Zm00024ab288640	322	Pfam	PF00704	Glycosyl hydrolases family 18	37	259	1.4e-11	IPR001223	Glycoside hydrolase family 18, catalytic domain
Ki11	milt_AC198975_6250	Ogre	LTR/Ty3	Temperate removal	Zm00030ab284030	322	Pfam	PF00704	Glycosyl hydrolases family 18	37	259	1.3e-11	IPR001223	Glycoside hydrolase family 18, catalytic domain	GO:0005975
Mo18W	ruda_AC195952_4839	SIRE	LTR/Ty1	Temperate removal	Zm00034ab071900	268	Pfam	PF09430	Protein of unknown function (DUF2012)	178	261	1.2e-11	IPR019008	Domain of unknown function DUF2012
CML277	prem1_AC200105_6751	Tekay	LTR/Ty3	Tropical amplification	Zm00024ab071820	496	Pfam	PF03725	3' exoribonuclease family, domain 2	122	186	1.2e-11	IPR015847	Exoribonuclease, phosphorolytic domain 2
Ki3	flip_AC194904_4319	Tekay	LTR/Ty3	Tropical amplification	Zm00029ab086120	371	Pfam	PF00128	Alpha amylase, catalytic domain	47	304	1.1e-11	IPR006047	Glycosyl hydrolase, family 13, catalytic domain
CML333	prem1_AC196065_4927	NA	LTR/Ty3	Tropical amplification	Zm00026ab056250	606	Pfam	PF13167	GTP-binding GTPase N-terminal	123	190	1.1e-11	IPR025121	GTPase HflX, N-terminal
CML228	doke_AC197224_5479	Retand	LTR/Ty3	Tropical amplification	Zm00022ab244740	368	Pfam	PF04928	Poly(A) polymerase central domain	12	284	8.9e-12	IPR007012	Poly(A) polymerase, central domain
Tx303	chr6_D_62813001	SIRE	LTR/Ty1	Tropical amplification	Zm00041ab137740	91	Pfam	PF02841	Guanylate-binding protein, C-terminal domain	17	91	8e-12	IPR003191	Guanylate-binding protein/Atlastin, C-terminal
Oh43	xilon_diguus_AC203313_7774	Tekay	LTR/Ty3	Tropical amplification	Zm00039ab100120	243	Pfam	PF03087	Arabidopsis protein of unknown function	155	238	7e-12	IPR004320	Protein of unknown function DUF241, plant
CML103	xilon_diguus_AC203313_7774	Tekay	LTR/Ty3	Tropical amplification	Zm00021ab142750	307	Pfam	PF13639	Ring finger domain	168	210	5.6e-12	IPR001841	Zinc finger, RING-type
B97	xilon_diguus_AC203313_7774	Tekay	LTR/Ty3	Tropical amplification	Zm00018ab102180	216	Pfam	PF03087	Arabidopsis protein of unknown function	128	211	5.3e-12	IPR004320	Protein of unknown function DUF241, plant
Ki11	xilon_diguus_AC203313_7774	Tekay	LTR/Ty3	Tropical amplification	Zm00030ab365660	304	Pfam	PF02798	Glutathione S-transferase, N-terminal domain	94	162	4.9e-12	IPR004045	Glutathione S-transferase, N-terminal	GO:0005515
CML52	prem1_AC206253_9147	NA	LTR/Ty3	Tropical amplification	Zm00019ab289800	419	Pfam	PF16746	BAR domain of APPL family	221	285	4.8e-12
CML247	machiavelli_AC200490_6883	TAR	LTR/Ty1	Temperate removal	Zm00023ab205930	112	Pfam	PF13968	Domain of unknown function (DUF4220)	54	111	4.7e-12	IPR025315	Domain of unknown function DUF4220
CML103	machiavelli_AC200490_6883	TAR	LTR/Ty1	Temperate removal	Zm00021ab202980	112	Pfam	PF13968	Domain of unknown function (DUF4220)	54	111	4.7e-12	IPR025315	Domain of unknown function DUF4220
Ki11	cinful_zeon_AC201757_7049	Retand	LTR/Ty3	Tropical amplification	Zm00030ab242750	196	Pfam	PF01459	Eukaryotic porin	2	60	4.6e-12	IPR027246	Eukaryotic porin/Tom40	GO:0005741|GO:0055085
NC350	cinful_zeon_AC201757_7049	Retand	LTR/Ty3	Tropical amplification	Zm00036ab246820	184	Pfam	PF01459	Eukaryotic porin	2	60	4e-12	IPR027246	Eukaryotic porin/Tom40	GO:0005741|GO:0055085
Oh7B	prem1_AC196065_4927	Tekay	LTR/Ty3	Tropical amplification	Zm00038ab271110	209	Pfam	PF00226	DnaJ domain	125	160	3.9e-12	IPR001623	DnaJ domain
CML277	cinful_zeon_AC201757_7049	Retand	LTR/Ty3	Tropical amplification	Zm00024ab245150	155	Pfam	PF01459	Eukaryotic porin	2	59	3.9e-12	IPR027246	Eukaryotic porin/Tom40
NC350	chr6_P_87978263	SIRE	LTR/Ty1	Tropical amplification	Zm00036ab013930	99	Pfam	PF00733	Asparagine synthase	1	78	3.6e-12	IPR001962	Asparagine synthase	GO:0004066|GO:0006529
M162W	machiavelli_AC200490_6883	TAR	LTR/Ty1	Temperate removal	Zm00033ab106950	274	Pfam	PF02469	Fasciclin domain	52	184	2.8e-12	IPR000782	FAS1 domain
Ki3	CRM2_7577nt	CRM	LTR/Ty3	Temperate removal	Zm00029ab338360	754	Pfam	PF06972	Protein of unknown function (DUF1296)	711	754	2.8e-12	IPR009719	GBF-interacting protein 1
CML322	CRM2_7577nt	CRM	LTR/Ty3	Temperate removal	Zm00025ab335150	754	Pfam	PF06972	Protein of unknown function (DUF1296)	711	754	2.8e-12	IPR009719	GBF-interacting protein 1
CML322	machiavelli_AC200490_6883	TAR	LTR/Ty1	Temperate removal	Zm00025ab104720	274	Pfam	PF02469	Fasciclin domain	52	184	2.8e-12	IPR000782	FAS1 domain
B97	machiavelli_AC200490_6883	TAR	LTR/Ty1	Temperate removal	Zm00018ab103940	274	Pfam	PF02469	Fasciclin domain	52	184	2.8e-12	IPR000782	FAS1 domain
Il14H	cinful_zeon_AC201757_7049	Retand	LTR/Ty3	Tropical amplification	Zm00028ab248080	152	Pfam	PF01459	Eukaryotic porin	2	60	2.6e-12	IPR027246	Eukaryotic porin/Tom40
Tzi8	prem1_AC200105_6751	NA	LTR/Ty3	Tropical amplification	Zm00042ab304260	446	Pfam	PF16796	Microtubule binding	318	394	2.4e-12	IPR031852	Spindle pole body-associated protein Vik1/Cik1, microtubule binding domain
CML322	moorud_AC199961_6697	Reina	LTR/Ty3	Tropical amplification	Zm00025ab142410	415	Pfam	PF00931	NB-ARC domain	180	384	2.3e-12	IPR002182	NB-ARC
NC350	TE_00002958	Tork	LTR/Ty1	Tropical amplification	Zm00036ab340700	112	Pfam	PF00141	Peroxidase	23	75	2.1e-12	IPR002016	Haem peroxidase	GO:0004601|GO:0006979|GO:0020037|GO:0055114
CML228	xilon_diguus_AC203313_7774	Tekay	LTR/Ty3	Tropical amplification	Zm00022ab138520	379	Pfam	PF04142	Nucleotide-sugar transporter	256	342	2e-12	IPR007271	Nucleotide-sugar transporter
CML277	prem1_AC206253_9147	NA	LTR/Ty3	Tropical amplification	Zm00024ab257280	621	Pfam	PF14780	Domain of unknown function (DUF4477)	23	171	1.9e-12	IPR027951	Domain of unknown function DUF4477
CML103	prem1_AC206253_9147	unknown	LTR/Ty3	Tropical amplification	Zm00021ab256650	621	Pfam	PF14780	Domain of unknown function (DUF4477)	23	171	1.9e-12	IPR027951	Domain of unknown function DUF4477
Ki11	prem1_AC196065_4927	Tekay	LTR/Ty3	Tropical amplification	Zm00030ab191220	204	Pfam	PF04934	MED6 mediator sub complex component	148	199	1.8e-12	IPR007018	Mediator complex, subunit Med6	GO:0003712|GO:0006357|GO:0016592
HP301	prem1_AC196065_4927	Tekay	LTR/Ty3	Tropical amplification	Zm00027ab193270	204	Pfam	PF04934	MED6 mediator sub complex component	148	199	1.8e-12	IPR007018	Mediator complex, subunit Med6
CML228	prem1_AC196065_4927	Tekay	LTR/Ty3	Tropical amplification	Zm00022ab192680	204	Pfam	PF04934	MED6 mediator sub complex component	148	199	1.8e-12	IPR007018	Mediator complex, subunit Med6
CML69	prem1_AC196065_4927	Tekay	LTR/Ty3	Tropical amplification	Zm00020ab192570	204	Pfam	PF04934	MED6 mediator sub complex component	148	199	1.8e-12	IPR007018	Mediator complex, subunit Med6
CML69	opie_AC202033_7274	SIRE	LTR/Ty1	Tropical amplification	Zm00020ab023200	106	Pfam	PF14547	Hydrophobic seed protein	39	104	1.8e-12	IPR027923	Hydrophobic seed protein domain
M162W	opie_AC202033_7274	SIRE	LTR/Ty1	Tropical amplification	Zm00033ab024030	105	Pfam	PF14547	Hydrophobic seed protein	38	103	1.7e-12	IPR027923	Hydrophobic seed protein domain
Tzi8	cinful_zeon_AC207755_9705	Retand	LTR/Ty3	Temperate removal	Zm00042ab028750	782	Pfam	PF01453	D-mannose binding lectin	74	161	1.3e-12	IPR001480	Bulb-type lectin domain
Oh7B	cinful_zeon_AC207755_9705	Retand	LTR/Ty3	Temperate removal	Zm00038ab029110	782	Pfam	PF01453	D-mannose binding lectin	74	161	1.3e-12	IPR001480	Bulb-type lectin domain
HP301	prem1_AC212325_11702	Tekay	LTR/Ty3	Tropical amplification	Zm00027ab265600	361	Pfam	PF10248	Myelodysplasia-myeloid leukemia factor 1-interacting protein	66	297	1.3e-12	IPR019376	Myeloid leukemia factor
HP301	cinful_zeon_AC207755_9705	Retand	LTR/Ty3	Temperate removal	Zm00027ab028370	782	Pfam	PF01453	D-mannose binding lectin	74	161	1.3e-12	IPR001480	Bulb-type lectin domain
CML333	cinful_zeon_AC207755_9705	Retand	LTR/Ty3	Temperate removal	Zm00026ab027730	782	Pfam	PF01453	D-mannose binding lectin	74	161	1.3e-12	IPR001480	Bulb-type lectin domain
Tzi8	doke_AC197224_5479	Retand	LTR/Ty3	Tropical amplification	Zm00042ab403820	99	Pfam	PF00201	UDP-glucoronosyl and UDP-glucosyl transferase	3	64	1.2e-12	IPR002213	UDP-glucuronosyl/UDP-glucosyltransferase
NC358	doke_AC197224_5479	Retand	LTR/Ty3	Tropical amplification	Zm00037ab389690	99	Pfam	PF00201	UDP-glucoronosyl and UDP-glucosyl transferase	3	64	1.2e-12	IPR002213	UDP-glucuronosyl/UDP-glucosyltransferase
M162W	doke_AC197224_5479	Retand	LTR/Ty3	Tropical amplification	Zm00033ab408090	99	Pfam	PF00201	UDP-glucoronosyl and UDP-glucosyl transferase	3	64	1.2e-12	IPR002213	UDP-glucuronosyl/UDP-glucosyltransferase
NC358	xilon_diguus_AC203313_7774	Tekay	LTR/Ty3	Tropical amplification	Zm00037ab234800	244	Pfam	PF16746	BAR domain of APPL family	51	124	8.4e-13
CML52	prem1_AC196065_4927	Tekay	LTR/Ty3	Tropical amplification	Zm00019ab180050	147	Pfam	PF04934	MED6 mediator sub complex component	91	142	8.2e-13	IPR007018	Mediator complex, subunit Med6
B73	ji_AC215728_13156	SIRE	LTR/Ty1	Temperate removal	Zm00001eb218060	108	Pfam	PF02519	Auxin responsive protein	28	101	5.1e-13	IPR003676	Small auxin-up RNA	GO:0009733
CML52	cinful_zeon_AC206615_9266	Retand	LTR/Ty3	Tropical amplification	Zm00019ab297730	123	Pfam	PF00226	DnaJ domain	64	97	4.8e-13	IPR001623	DnaJ domain
Ki11	CRM2_7577nt	CRM	LTR/Ty3	Temperate removal	Zm00030ab132950	384	Pfam	PF03017	TNP1/EN/SPM transposase	319	366	4e-13	IPR004264	Transposase, Tnp1/En/Spm-like
CML52	xilon_diguus_AC203313_7774	Tekay	LTR/Ty3	Tropical amplification	Zm00019ab125140	349	Pfam	PF03171	2OG-Fe(II) oxygenase superfamily	207	273	3.1e-13	IPR005123	Oxoglutarate/iron-dependent dioxygenase
HP301	prem1_AC200105_6751	Tekay	LTR/Ty3	Tropical amplification	Zm00027ab271730	213	Pfam	PF03489	Saposin-like type B, region 2	107	140	2e-13	IPR008138	Saposin B type, region 2
CML322	prem1_AC200105_6751	Tekay	LTR/Ty3	Tropical amplification	Zm00025ab277780	213	Pfam	PF03489	Saposin-like type B, region 2	107	140	2e-13	IPR008138	Saposin B type, region 2
B97	xilon_diguus_AC203313_7774	Tekay	LTR/Ty3	Tropical amplification	Zm00018ab267040	256	Pfam	PF00155	Aminotransferase class I and II	112	243	1.9e-13	IPR004839	Aminotransferase, class I/classII
CML69	cinful_zeon_AC194954_4372	Retand	LTR/Ty3	Tropical amplification	Zm00020ab015970	712	Pfam	PF18052	Rx N-terminal domain	39	99	9e-14	IPR041118	Rx, N-terminal
B73	machiavelli_AC200490_6883	TAR	LTR/Ty1	Temperate removal	Zm00001eb047640	96	Pfam	PF04185	Phosphoesterase family	5	79	5.8e-14	IPR007312	Phosphoesterase	GO:0016788
CML322	TE_00007661	NA	LTR/unknown	Tropical amplification	Zm00025ab403430	745	Pfam	PF08276	PAN-like domain	360	429	5.2e-14	IPR003609	PAN/Apple domain
CML52	machiavelli_AC200490_6883	TAR	LTR/Ty1	Temperate removal	Zm00019ab110920	126	Pfam	PF00082	Subtilase family	5	55	5e-14	IPR000209	Peptidase S8/S53 domain
CML103	xilon_diguus_AC203313_7774	Tekay	LTR/Ty3	Tropical amplification	Zm00021ab140080	571	Pfam	PF01920	Prefoldin subunit	349	411	4.6e-14	IPR002777	Prefoldin beta-like
CML277	prem1_AC200105_6751	Tekay	LTR/Ty3	Tropical amplification	Zm00024ab071820	496	Pfam	PF00650	CRAL/TRIO domain	347	406	3.6e-14	IPR001251	CRAL-TRIO lipid binding domain
Oh7B	xilon_diguus_AC203313_7774	Tekay	LTR/Ty3	Tropical amplification	Zm00038ab243260	210	Pfam	PF13639	Ring finger domain	154	197	2.1e-14	IPR001841	Zinc finger, RING-type
Oh7B	xilon_diguus_AC203313_7774	Tekay	LTR/Ty3	Tropical amplification	Zm00038ab210970	727	Pfam	PF03328	HpcH/HpaI aldolase/citrate lyase family	555	644	1.8e-14	IPR005000	HpcH/HpaI aldolase/citrate lyase domain
Oh7B	chr6_D_62813001	SIRE	LTR/Ty1	Tropical amplification	Zm00038ab135350	116	Pfam	PF03092	BT1 family	1	69	1.7e-14	IPR039309	Biopterin transporter family
Ki3	flip_AC208040_9765	Tekay	LTR/Ty3	Tropical amplification	Zm00029ab326570	255	Pfam	PF02170	PAZ domain	166	252	1.6e-14	IPR003100	PAZ domain
NC358	ji_AC204382_8228	unknown	LTR/Ty1	Temperate removal	Zm00037ab096660	291	Pfam	PF08392	FAE1/Type III polyketide synthase-like protein	114	159	1.4e-14	IPR013601	FAE1/Type III polyketide synthase-like protein
CML333	avahi_AC191363_3084	NA	LTR/unknown	Tropical amplification	Zm00026ab106890	263	Pfam	PF03144	Elongation factor Tu domain 2	94	159	9.1e-15	IPR004161	Translation elongation factor EFTu-like, domain 2
CML69	avahi_AC191363_3084	NA	LTR/unknown	Tropical amplification	Zm00020ab107570	263	Pfam	PF03144	Elongation factor Tu domain 2	94	159	9.1e-15	IPR004161	Translation elongation factor EFTu-like, domain 2
Mo18W	machiavelli_AC200490_6883	TAR	LTR/Ty1	Temperate removal	Zm00034ab212240	321	Pfam	PF04578	Protein of unknown function, DUF594	283	320	7.3e-15	IPR007658	Protein of unknown function DUF594
Ki3	machiavelli_AC200490_6883	TAR	LTR/Ty1	Temperate removal	Zm00029ab207180	321	Pfam	PF04578	Protein of unknown function, DUF594	283	320	7.3e-15	IPR007658	Protein of unknown function DUF594
CML322	opie_AC202033_7274	SIRE	LTR/Ty1	Tropical amplification	Zm00025ab130760	174	Pfam	PF00067	Cytochrome P450	9	139	7.1e-15	IPR001128	Cytochrome P450
M162W	doke_AC197224_5479	Retand	LTR/Ty3	Tropical amplification	Zm00033ab275050	240	Pfam	PF02770	Acyl-CoA dehydrogenase, middle domain	1	115	6.9e-15	IPR006091	Acyl-CoA oxidase/dehydrogenase, central domain
Oh7B	cinful_zeon_AC206615_9266	Retand	LTR/Ty3	Tropical amplification	Zm00038ab389280	320	Pfam	PF01287	Eukaryotic elongation factor 5A hypusine, DNA-binding OB fold	73	115	6.7e-15	IPR020189	Translation elongation factor, IF5A C-terminal
CML228	machiavelli_AC200490_6883	TAR	LTR/Ty1	Temperate removal	Zm00022ab202850	285	Pfam	PF04578	Protein of unknown function, DUF594	247	284	6.1e-15	IPR007658	Protein of unknown function DUF594
M162W	cinful_zeon_AC186530_1513	Retand	LTR/Ty3	Tropical amplification	Zm00033ab327770	301	Pfam	PF00900	Ribosomal family S4e	194	255	5.9e-15	IPR013845	Ribosomal protein S4e, central region
B73	cinful_zeon_AC206615_9266	Retand	LTR/Ty3	Tropical amplification	Zm00001eb373470	186	Pfam	PF01287	Eukaryotic elongation factor 5A hypusine, DNA-binding OB fold	87	128	5.5e-15	IPR020189	Translation elongation factor, IF5A C-terminal	GO:0003723|GO:0003746|GO:0006452|GO:0043022|GO:0045901|GO:0045905
B97	chr6_P_87978263	SIRE	LTR/Ty1	Tropical amplification	Zm00018ab226890	142	Pfam	PF01287	Eukaryotic elongation factor 5A hypusine, DNA-binding OB fold	63	104	5.2e-15	IPR020189	Translation elongation factor, IF5A C-terminal
CML228	CRM2_7577nt	CRM	LTR/Ty3	Temperate removal	Zm00022ab395370	587	Pfam	PF03004	Plant transposase (Ptta/En/Spm family)	212	309	5e-15	IPR004252	Probable transposase, Ptta/En/Spm, plant
M37W	cinful_zeon_AC206615_9266	Retand	LTR/Ty3	Tropical amplification	Zm00032ab389330	151	Pfam	PF01287	Eukaryotic elongation factor 5A hypusine, DNA-binding OB fold	32	73	3.8e-15	IPR020189	Translation elongation factor, IF5A C-terminal
CML52	labu_AC188126_2057	Reina	LTR/Ty3	Tropical amplification	Zm00019ab284140	307	Pfam	PF00730	HhH-GPD superfamily base excision DNA repair protein	108	250	2.7e-15	IPR003265	HhH-GPD domain
M37W	chr6_P_87978263	SIRE	LTR/Ty1	Tropical amplification	Zm00032ab331940	799	Pfam	PF00702	haloacid dehalogenase-like hydrolase	290	521	2e-15
CML322	TE_00007661	NA	LTR/unknown	Tropical amplification	Zm00025ab403430	745	Pfam	PF00954	S-locus glycoprotein domain	224	331	1.8e-15	IPR000858	S-locus glycoprotein domain
CML277	TE_00002958	Tork	LTR/Ty1	Tropical amplification	Zm00024ab258980	506	Pfam	PF00139	Legume lectin domain	1	77	1.8e-15	IPR001220	Legume lectin domain
Ki11	cinful_zeon_AC206615_9266	Retand	LTR/Ty3	Tropical amplification	Zm00030ab375730	127	Pfam	PF01287	Eukaryotic elongation factor 5A hypusine, DNA-binding OB fold	73	118	1.1e-15	IPR020189	Translation elongation factor, IF5A C-terminal	GO:0003723|GO:0003746|GO:0006452|GO:0043022|GO:0045901|GO:0045905
CML322	ji_AC215728_13156	SIRE	LTR/Ty1	Temperate removal	Zm00025ab400110	644	Pfam	PF03770	Inositol polyphosphate kinase	141	234	1.1e-15	IPR005522	Inositol polyphosphate kinase
CML333	prem1_AC196065_4927	NA	LTR/Ty3	Tropical amplification	Zm00026ab056250	606	Pfam	PF16360	GTP-binding GTPase Middle Region	193	307	1e-15	IPR032305	GTP-binding protein, middle domain
NC350	xilon_diguus_AC203313_7774	Tekay	LTR/Ty3	Tropical amplification	Zm00036ab032310	370	Pfam	PF00091	Tubulin/FtsZ family, GTPase domain	57	123	8.7e-16	IPR003008	Tubulin/FtsZ, GTPase domain	GO:0003924
NC358	chr6_P_87978263	SIRE	LTR/Ty1	Tropical amplification	Zm00037ab301490	95	Pfam	PF00022	Actin	5	71	8.2e-16	IPR004000	Actin family
CML333	chr6_P_87978263	SIRE	LTR/Ty1	Tropical amplification	Zm00026ab375430	210	Pfam	PF08498	Sterol methyltransferase C-terminal	143	199	7.6e-16	IPR013705	Sterol methyltransferase C-terminal
Mo18W	xilon_diguus_AC203313_7774	Tekay	LTR/Ty3	Tropical amplification	Zm00034ab371470	491	Pfam	PF00257	Dehydrin	251	320	4.7e-16	IPR000167	Dehydrin
Oh43	cinful_zeon_AC201757_7049	Retand	LTR/Ty3	Tropical amplification	Zm00039ab110380	388	Pfam	PF03966	Trm112p-like protein	3	120	4e-16	IPR005651	Trm112-like
B73	xilon_diguus_AC203313_7774	Tekay	LTR/Ty3	Tropical amplification	Zm00001eb179030	317	Pfam	PF03171	2OG-Fe(II) oxygenase superfamily	158	253	3.8e-16	IPR005123	Oxoglutarate/iron-dependent dioxygenase	GO:0016491|GO:0055114
CML333	prem1_AC196065_4927	NA	LTR/Ty3	Tropical amplification	Zm00026ab056250	606	Pfam	PF01926	50S ribosome-binding GTPase	321	442	3.4e-16	IPR006073	GTP binding domain
CML52	xilon_diguus_AC203313_7774	Tekay	LTR/Ty3	Tropical amplification	Zm00019ab222030	163	Pfam	PF01412	Putative GTPase activating protein for Arf	82	146	3.4e-16	IPR001164	Arf GTPase activating protein
CML247	huck_AC203007_7610	Retand	LTR/Ty3	Tropical amplification	Zm00023ab246320	139	Pfam	PF00394	Multicopper oxidase	70	138	2.1e-16	IPR001117	Multicopper oxidase, type 1
NC350	xilon_diguus_AC203313_7774	Tekay	LTR/Ty3	Tropical amplification	Zm00036ab294250	498	Pfam	PF08071	RS4NT (NUC023) domain	123	159	1.4e-16	IPR013843	Ribosomal protein S4e, N-terminal
CML52	xilon_diguus_AC203313_7774	Tekay	LTR/Ty3	Tropical amplification	Zm00019ab273460	492	Pfam	PF08071	RS4NT (NUC023) domain	122	158	1.4e-16	IPR013843	Ribosomal protein S4e, N-terminal
CML228	xilon_diguus_AC203313_7774	Tekay	LTR/Ty3	Tropical amplification	Zm00022ab235330	253	Pfam	PF16746	BAR domain of APPL family	39	134	1.2e-16
Ki3	doke_AC197224_5479	Retand	LTR/Ty3	Tropical amplification	Zm00029ab271220	349	Pfam	PF02770	Acyl-CoA dehydrogenase, middle domain	107	224	3.6e-17	IPR006091	Acyl-CoA oxidase/dehydrogenase, central domain
B73	machiavelli_AC200490_6883	NA	LTR/Ty1	Temperate removal	Zm00001eb196000	440	Pfam	PF00320	GATA zinc finger	370	404	2.5e-17	IPR000679	Zinc finger, GATA-type	GO:0006355|GO:0008270|GO:0043565
CML247	doke_AC197224_5479	Retand	LTR/Ty3	Tropical amplification	Zm00023ab267310	292	Pfam	PF02770	Acyl-CoA dehydrogenase, middle domain	50	167	2.4e-17	IPR006091	Acyl-CoA oxidase/dehydrogenase, central domain
Oh43	machiavelli_AC200490_6883	NA	LTR/Ty1	Temperate removal	Zm00039ab200100	415	Pfam	PF00320	GATA zinc finger	345	379	2.3e-17	IPR000679	Zinc finger, GATA-type	GO:0006355|GO:0008270|GO:0043565
HP301	machiavelli_AC200490_6883	NA	LTR/Ty1	Temperate removal	Zm00027ab199320	419	Pfam	PF00320	GATA zinc finger	210	244	1.9e-17	IPR000679	Zinc finger, GATA-type
Tx303	machiavelli_AC200490_6883	TAR	LTR/Ty1	Temperate removal	Zm00041ab406570	266	Pfam	PF03330	Lytic transglycolase	79	158	1.4e-17	IPR009009	RlpA-like protein, double-psi beta-barrel domain
Oh43	prem1_AC196065_4927	Tekay	LTR/Ty3	Tropical amplification	Zm00039ab387440	430	Pfam	PF00940	DNA-dependent RNA polymerase	141	186	6.7e-18	IPR002092	DNA-directed RNA polymerase, phage-type	GO:0003677|GO:0003899|GO:0006351
CML52	cinful_zeon_AC209373_10201	Retand	LTR/Ty3	Temperate removal	Zm00019ab042130	466	Pfam	PF18052	Rx N-terminal domain	8	91	5.4e-18	IPR041118	Rx, N-terminal
NC358	chr6_P_87978263	SIRE	LTR/Ty1	Tropical amplification	Zm00037ab226400	134	Pfam	PF01694	Rhomboid family	1	101	2.6e-18	IPR022764	Peptidase S54, rhomboid domain
M162W	cinful_zeon_AC186530_1513	Retand	LTR/Ty3	Tropical amplification	Zm00033ab327770	301	Pfam	PF08071	RS4NT (NUC023) domain	113	147	2.5e-18	IPR013843	Ribosomal protein S4e, N-terminal
CML228	doke_AC197224_5479	Retand	LTR/Ty3	Tropical amplification	Zm00022ab037480	445	Pfam	PF05700	Breast carcinoma amplified sequence 2 (BCAS2)	346	411	2e-18	IPR008409	Pre-mRNA-splicing factor SPF27
CML228	prem1_AC196065_4927	NA	LTR/Ty3	Tropical amplification	Zm00022ab247380	367	Pfam	PF00622	SPRY domain	73	189	1.5e-18	IPR003877	SPRY domain
CML52	chr6_P_87978263	SIRE	LTR/Ty1	Tropical amplification	Zm00019ab237690	109	Pfam	PF04782	Protein of unknown function (DUF632)	5	100	1.1e-18	IPR006867	Domain of unknown function DUF632
NC350	xilon_diguus_AC203313_7774	Tekay	LTR/Ty3	Tropical amplification	Zm00036ab032310	370	Pfam	PF03953	Tubulin C-terminal domain	208	267	9.9e-19	IPR018316	Tubulin/FtsZ, 2-layer sandwich domain
Tx303	milt_AC198975_6250	Ogre	LTR/Ty3	Temperate removal	Zm00041ab406610	261	Pfam	PF03330	Lytic transglycolase	68	149	7.1e-19	IPR009009	RlpA-like protein, double-psi beta-barrel domain
CML247	prem1_AC196065_4927	unknown	LTR/Ty3	Tropical amplification	Zm00023ab251310	262	Pfam	PF00622	SPRY domain	73	189	7e-19	IPR003877	SPRY domain
CML322	xilon_diguus_AC203313_7774	Tekay	LTR/Ty3	Tropical amplification	Zm00025ab251030	798	Pfam	PF18052	Rx N-terminal domain	723	789	6.3e-19	IPR041118	Rx, N-terminal
Tzi8	giepum_AC197531_5634	SIRE	LTR/Ty1	Temperate removal	Zm00042ab114510	145	Pfam	PF03959	Serine hydrolase (FSH1)	4	98	4.2e-19	IPR005645	Serine hydrolase FSH
Mo18W	chr6_P_87978263	SIRE	LTR/Ty1	Tropical amplification	Zm00034ab356340	271	Pfam	PF06886	Targeting protein for Xklp2 (TPX2)	94	150	3.5e-19	IPR027329	TPX2, C-terminal
M162W	ji_AC204382_8228	unknown	LTR/Ty1	Temperate removal	Zm00033ab130260	152	Pfam	PF05056	Protein of unknown function (DUF674)	1	131	2.8e-19	IPR007750	Protein of unknown function DUF674
CML103	ji_AC204382_8228	unknown	LTR/Ty1	Temperate removal	Zm00021ab124480	152	Pfam	PF05056	Protein of unknown function (DUF674)	1	131	2.8e-19	IPR007750	Protein of unknown function DUF674
CML69	ji_AC204382_8228	unknown	LTR/Ty1	Temperate removal	Zm00020ab124490	152	Pfam	PF05056	Protein of unknown function (DUF674)	1	131	2.8e-19	IPR007750	Protein of unknown function DUF674
CML52	machiavelli_AC200490_6883	TAR	LTR/Ty1	Temperate removal	Zm00019ab313420	187	Pfam	PF14845	beta-acetyl hexosaminidase like	32	149	2.7e-19	IPR029019	Beta-hexosaminidase, eukaryotic type, N-terminal
NC358	sido_AC204367_8219	Reina	LTR/Ty3	Tropical amplification	Zm00037ab141450	237	Pfam	PF00072	Response regulator receiver domain	12	136	1e-19	IPR001789	Signal transduction response regulator, receiver domain
Ki11	prem1_AC206253_9147	NA	LTR/Ty3	Tropical amplification	Zm00030ab081120	138	Pfam	PF00282	Pyridoxal-dependent decarboxylase conserved domain	41	137	9.8e-20	IPR002129	Pyridoxal phosphate-dependent decarboxylase	GO:0016831|GO:0019752|GO:0030170
B97	chr6_P_87978263	SIRE	LTR/Ty1	Tropical amplification	Zm00018ab049790	297	Pfam	PF00662	NADH-Ubiquinone oxidoreductase (complex I), chain 5 N-terminus	72	129	6.9e-20	IPR001516	NADH-Ubiquinone oxidoreductase (complex I), chain 5 N-terminal
NC358	doke_AC197224_5479	Retand	LTR/Ty3	Tropical amplification	Zm00037ab036850	181	Pfam	PF05700	Breast carcinoma amplified sequence 2 (BCAS2)	60	129	6.2e-20	IPR008409	Pre-mRNA-splicing factor SPF27
CML228	CRM2_7577nt	CRM	LTR/Ty3	Temperate removal	Zm00022ab395370	587	Pfam	PF03017	TNP1/EN/SPM transposase	475	537	4.1e-20	IPR004264	Transposase, Tnp1/En/Spm-like
Ki3	CRM2_7577nt	CRM	LTR/Ty3	Temperate removal	Zm00029ab338360	754	Pfam	PF14363	Domain associated at C-terminal with AAA	56	162	3.4e-20	IPR025753	AAA-type ATPase, N-terminal domain
Ki3	chr6_P_87978263	SIRE	LTR/Ty1	Tropical amplification	Zm00029ab207280	603	Pfam	PF11926	Domain of unknown function (DUF3444)	529	598	3.4e-20	IPR024593	Domain of unknown function DUF3444
CML322	CRM2_7577nt	CRM	LTR/Ty3	Temperate removal	Zm00025ab335150	754	Pfam	PF14363	Domain associated at C-terminal with AAA	56	162	3.4e-20	IPR025753	AAA-type ATPase, N-terminal domain
NC358	ji_AC204382_8228	unknown	LTR/Ty1	Temperate removal	Zm00037ab157180	294	Pfam	PF14380	Wall-associated receptor kinase C-terminal	185	277	3.2e-20	IPR032872	Wall-associated receptor kinase, C-terminal
P39	opie_AC202033_7274	SIRE	LTR/Ty1	Tropical amplification	Zm00040ab163420	238	Pfam	PF03501	Plectin/S10 domain	1	49	2e-20	IPR005326	Plectin/S10, N-terminal
NC350	xilon_diguus_AC203313_7774	Tekay	LTR/Ty3	Tropical amplification	Zm00036ab294250	498	Pfam	PF00900	Ribosomal family S4e	208	270	2e-20	IPR013845	Ribosomal protein S4e, central region
CML52	xilon_diguus_AC203313_7774	Tekay	LTR/Ty3	Tropical amplification	Zm00019ab273460	492	Pfam	PF00900	Ribosomal family S4e	207	269	2e-20	IPR013845	Ribosomal protein S4e, central region
CML322	machiavelli_AC200490_6883	TAR	LTR/Ty1	Temperate removal	Zm00025ab226040	519	Pfam	PF00900	Ribosomal family S4e	265	319	1.8e-20	IPR013845	Ribosomal protein S4e, central region
HP301	chr6_P_87978263	SIRE	LTR/Ty1	Tropical amplification	Zm00027ab228310	155	Pfam	PF01694	Rhomboid family	1	126	1.4e-20	IPR022764	Peptidase S54, rhomboid domain
CML333	doke_AC197224_5479	Retand	LTR/Ty3	Tropical amplification	Zm00026ab036400	399	Pfam	PF06246	Isy1-like splicing family	68	129	9.3e-21	IPR009360	Pre-mRNA-splicing factor Isy1
Ki11	prem1_AC200105_6751	Tekay	LTR/Ty3	Tropical amplification	Zm00030ab283880	253	Pfam	PF09497	Transcription mediator complex subunit Med12	165	222	9.1e-21	IPR019035	Mediator complex, subunit Med12	GO:0003712|GO:0006357|GO:0016592
CML103	prem1_AC200105_6751	Tekay	LTR/Ty3	Tropical amplification	Zm00021ab287540	253	Pfam	PF09497	Transcription mediator complex subunit Med12	165	222	9.1e-21	IPR019035	Mediator complex, subunit Med12
CML322	doke_AC197224_5479	Retand	LTR/Ty3	Tropical amplification	Zm00025ab038490	420	Pfam	PF06246	Isy1-like splicing family	68	130	7.3e-21	IPR009360	Pre-mRNA-splicing factor Isy1
Mo18W	ji_AC204382_8228	unknown	LTR/Ty1	Temperate removal	Zm00034ab076070	173	Pfam	PF14009	Domain of unknown function (DUF4228)	1	135	4.8e-21	IPR025322	Protein of unknown function DUF4228, plant
NC358	ji_AC215728_13156	SIRE	LTR/Ty1	Temperate removal	Zm00037ab142980	316	Pfam	PF05608	Protein of unknown function (DUF778)	208	305	4.6e-21	IPR008496	TMEM222/RTE1
Ki3	chr6_P_87978263	SIRE	LTR/Ty1	Tropical amplification	Zm00029ab207280	603	Pfam	PF00226	DnaJ domain	67	128	2.9e-21	IPR001623	DnaJ domain
Oh7B	doke_AC197224_5479	Retand	LTR/Ty3	Tropical amplification	Zm00038ab038120	323	Pfam	PF06246	Isy1-like splicing family	12	70	2.7e-21	IPR009360	Pre-mRNA-splicing factor Isy1
Mo18W	chr6_P_87978263	SIRE	LTR/Ty1	Tropical amplification	Zm00034ab423980	208	Pfam	PF07859	alpha/beta hydrolase fold	77	208	2.6e-21	IPR013094	Alpha/beta hydrolase fold-3
M162W	machiavelli_AC200490_6883	TAR	LTR/Ty1	Temperate removal	Zm00033ab231900	203	Pfam	PF00134	Cyclin, N-terminal domain	89	173	2.5e-21	IPR006671	Cyclin, N-terminal
Ky21	chr5_P_133655019	SIRE	LTR/Ty1	Tropical amplification	Zm00031ab310490	315	Pfam	PF01557	Fumarylacetoacetate (FAA) hydrolase family	19	116	2.3e-21	IPR011234	Fumarylacetoacetase-like, C-terminal	GO:0003824
CML277	cinful_zeon_AC186530_1513	Retand	LTR/Ty3	Tropical amplification	Zm00024ab203640	899	Pfam	PF04578	Protein of unknown function, DUF594	742	795	2.2e-21	IPR007658	Protein of unknown function DUF594
Ki3	flip_AC208040_9765	Tekay	LTR/Ty3	Tropical amplification	Zm00029ab326570	255	Pfam	PF08699	Argonaute linker 1 domain	110	159	2.1e-21	IPR014811	Argonaute, linker 1 domain
Tx303	xilon_diguus_AC203313_7774	Tekay	LTR/Ty3	Tropical amplification	Zm00041ab350130	307	Pfam	PF00022	Actin	1	141	1.5e-21	IPR004000	Actin family
Oh7B	bosohe_AC191654_3248	Reina	LTR/Ty3	Tropical amplification	Zm00038ab325440	142	Pfam	PF14968	Coiled coil protein 84	2	76	1.4e-21	IPR028015	Coiled-coil domain-containing protein 84
NC358	chr6_P_87978263	SIRE	LTR/Ty1	Tropical amplification	Zm00037ab303960	249	Pfam	PF13968	Domain of unknown function (DUF4220)	6	100	1.4e-21	IPR025315	Domain of unknown function DUF4220
CML103	uwum_AC190887_2701	unknown	LTR/unknown	Temperate removal	Zm00021ab282800	185	Pfam	PF09430	Protein of unknown function (DUF2012)	14	118	1.3e-21	IPR019008	Domain of unknown function DUF2012
CML228	doke_AC197224_5479	Retand	LTR/Ty3	Tropical amplification	Zm00022ab037480	445	Pfam	PF06246	Isy1-like splicing family	12	70	1.1e-21	IPR009360	Pre-mRNA-splicing factor Isy1
CML333	avahi_AC191363_3084	NA	LTR/unknown	Tropical amplification	Zm00026ab106890	263	Pfam	PF03143	Elongation factor Tu C-terminal domain	168	250	8.4e-22	IPR004160	Translation elongation factor EFTu/EF1A, C-terminal
CML69	avahi_AC191363_3084	NA	LTR/unknown	Tropical amplification	Zm00020ab107570	263	Pfam	PF03143	Elongation factor Tu C-terminal domain	168	250	8.4e-22	IPR004160	Translation elongation factor EFTu/EF1A, C-terminal
NC358	uwum_AC190887_2701	unknown	LTR/unknown	Temperate removal	Zm00037ab168540	176	Pfam	PF01095	Pectinesterase	30	165	7.4e-22	IPR000070	Pectinesterase, catalytic
CML103	TE_00002958	Tork	LTR/Ty1	Tropical amplification	Zm00021ab135140	306	Pfam	PF00561	alpha/beta hydrolase fold	29	170	6.9e-22	IPR000073	Alpha/beta hydrolase fold-1
Oh43	xilon_diguus_AC203313_7774	Tekay	LTR/Ty3	Tropical amplification	Zm00039ab283080	263	Pfam	PF00817	impB/mucB/samB family	53	201	5.8e-22	IPR001126	UmuC domain	GO:0006281
CML52	xilon_diguus_AC203313_7774	Tekay	LTR/Ty3	Tropical amplification	Zm00019ab266980	263	Pfam	PF00817	impB/mucB/samB family	53	201	5.8e-22	IPR001126	UmuC domain
CML322	cinful_zeon_AC186530_1513	Retand	LTR/Ty3	Tropical amplification	Zm00025ab107870	220	Pfam	PF00505	HMG (high mobility group) box	122	191	4.8e-22	IPR009071	High mobility group box domain
CML52	cinful_zeon_AC186530_1513	Retand	LTR/Ty3	Tropical amplification	Zm00019ab101410	220	Pfam	PF00505	HMG (high mobility group) box	122	191	4.8e-22	IPR009071	High mobility group box domain
B73	cinful_zeon_AC186530_1513	Retand	LTR/Ty3	Tropical amplification	Zm00001eb104320	207	Pfam	PF00505	HMG (high mobility group) box	109	178	4.3e-22	IPR009071	High mobility group box domain
NC350	doke_AC197224_5479	Retand	LTR/Ty3	Tropical amplification	Zm00036ab037810	319	Pfam	PF06246	Isy1-like splicing family	12	70	3.7e-22	IPR009360	Pre-mRNA-splicing factor Isy1	GO:0000350
CML247	chr6_D_62813001	SIRE	LTR/Ty1	Tropical amplification	Zm00023ab136170	204	Pfam	PF03092	BT1 family	1	78	2.9e-22	IPR039309	Biopterin transporter family
CML228	chr6_D_62813001	SIRE	LTR/Ty1	Tropical amplification	Zm00022ab134210	204	Pfam	PF03092	BT1 family	1	78	2.9e-22	IPR039309	Biopterin transporter family
Il14H	chr6_D_62813001	SIRE	LTR/Ty1	Tropical amplification	Zm00028ab135640	275	Pfam	PF02841	Guanylate-binding protein, C-terminal domain	163	275	1.9e-22	IPR003191	Guanylate-binding protein/Atlastin, C-terminal
CML277	chr6_D_62813001	SIRE	LTR/Ty1	Tropical amplification	Zm00024ab134640	260	Pfam	PF02841	Guanylate-binding protein, C-terminal domain	148	260	1.7e-22	IPR003191	Guanylate-binding protein/Atlastin, C-terminal
CML322	TE_00007661	NA	LTR/unknown	Tropical amplification	Zm00025ab403430	745	Pfam	PF01453	D-mannose binding lectin	76	183	1.3e-22	IPR001480	Bulb-type lectin domain
CML247	chr6_D_62813001	SIRE	LTR/Ty1	Tropical amplification	Zm00023ab136170	204	Pfam	PF02841	Guanylate-binding protein, C-terminal domain	92	204	9.3e-23	IPR003191	Guanylate-binding protein/Atlastin, C-terminal
CML228	chr6_D_62813001	SIRE	LTR/Ty1	Tropical amplification	Zm00022ab134210	204	Pfam	PF02841	Guanylate-binding protein, C-terminal domain	92	204	9.3e-23	IPR003191	Guanylate-binding protein/Atlastin, C-terminal
CML247	opie_AC202033_7274	SIRE	LTR/Ty1	Tropical amplification	Zm00023ab314570	489	Pfam	PF00620	RhoGAP domain	133	268	6.9e-23	IPR000198	Rho GTPase-activating protein domain
M37W	chr6_P_87978263	SIRE	LTR/Ty1	Tropical amplification	Zm00032ab331940	799	Pfam	PF00122	E1-E2 ATPase	98	272	6.6e-23
CML247	ji_AC215728_13156	SIRE	LTR/Ty1	Temperate removal	Zm00023ab368760	423	Pfam	PF03450	CO dehydrogenase flavoprotein C-terminal domain	309	415	6.1e-23	IPR005107	CO dehydrogenase flavoprotein, C-terminal
Oh7B	chr6_P_87978263	SIRE	LTR/Ty1	Tropical amplification	Zm00038ab260320	349	Pfam	PF13966	zinc-binding in reverse transcriptase	225	310	5.7e-23	IPR026960	Reverse transcriptase zinc-binding domain
Ky21	cinful_zeon_AC194954_4372	Retand	LTR/Ty3	Tropical amplification	Zm00031ab421030	153	Pfam	PF03171	2OG-Fe(II) oxygenase superfamily	2	102	5.5e-23	IPR005123	Oxoglutarate/iron-dependent dioxygenase	GO:0016491|GO:0055114
Ki3	machiavelli_AC200490_6883	TAR	LTR/Ty1	Temperate removal	Zm00029ab117690	311	Pfam	PF00082	Subtilase family	139	237	2e-23	IPR000209	Peptidase S8/S53 domain
NC358	chr6_D_62813001	SIRE	LTR/Ty1	Tropical amplification	Zm00037ab133010	119	Pfam	PF02841	Guanylate-binding protein, C-terminal domain	8	119	1.9e-23	IPR003191	Guanylate-binding protein/Atlastin, C-terminal
CML322	chr6_D_62813001	SIRE	LTR/Ty1	Tropical amplification	Zm00025ab136990	119	Pfam	PF02841	Guanylate-binding protein, C-terminal domain	8	119	1.9e-23	IPR003191	Guanylate-binding protein/Atlastin, C-terminal
B97	chr6_D_62813001	SIRE	LTR/Ty1	Tropical amplification	Zm00018ab136930	119	Pfam	PF02841	Guanylate-binding protein, C-terminal domain	8	119	1.9e-23	IPR003191	Guanylate-binding protein/Atlastin, C-terminal
Ki11	flip_AC194904_4319	Tekay	LTR/Ty3	Tropical amplification	Zm00030ab282380	242	Pfam	PF13774	Regulated-SNARE-like domain	29	109	1.5e-23	IPR010908	Longin domain
Il14H	chr6_D_62813001	SIRE	LTR/Ty1	Tropical amplification	Zm00028ab135640	275	Pfam	PF03092	BT1 family	67	149	1.4e-23	IPR039309	Biopterin transporter family
NC358	flip_AC194904_4319	Tekay	LTR/Ty3	Tropical amplification	Zm00037ab285980	221	Pfam	PF13774	Regulated-SNARE-like domain	29	109	1.3e-23	IPR010908	Longin domain
CML277	chr6_D_62813001	SIRE	LTR/Ty1	Tropical amplification	Zm00024ab134640	260	Pfam	PF03092	BT1 family	54	134	1.2e-23	IPR039309	Biopterin transporter family
Tzi8	prem1_AC196065_4927	Tekay	LTR/Ty3	Tropical amplification	Zm00042ab345480	459	Pfam	PF04043	Plant invertase/pectin methylesterase inhibitor	122	287	4.9e-24	IPR006501	Pectinesterase inhibitor domain
Ki11	prem1_AC196065_4927	Tekay	LTR/Ty3	Tropical amplification	Zm00030ab102340	526	Pfam	PF00012	Hsp70 protein	109	191	3.5e-24	IPR013126	Heat shock protein 70 family
NC358	doke_AC197224_5479	Retand	LTR/Ty3	Tropical amplification	Zm00037ab036850	181	Pfam	PF06136	Domain of unknown function (DUF966)	1	50	3e-24	IPR010369	Protein of unknown function DUF966
NC358	CRM2_7577nt	CRM	LTR/Ty3	Temperate removal	Zm00037ab253310	546	Pfam	PF00067	Cytochrome P450	152	485	2.2e-24	IPR001128	Cytochrome P450
Ky21	chr5_P_133655019	SIRE	LTR/Ty1	Tropical amplification	Zm00031ab310490	315	Pfam	PF14631	Fanconi anaemia protein FancD2 nuclease	132	279	1.9e-24	IPR029448	Fanconi anaemia protein FANCD2	GO:0006281
CML103	opie_AC202033_7274	SIRE	LTR/Ty1	Tropical amplification	Zm00021ab070010	206	Pfam	PF00005	ABC transporter	10	148	1.1e-24	IPR003439	ABC transporter-like
CML333	flip_AC211750_11412	Tekay	LTR/Ty3	Tropical amplification	Zm00026ab349020	319	Pfam	PF03106	WRKY DNA -binding domain	34	89	9.9e-25	IPR003657	WRKY domain
Tzi8	machiavelli_AC200490_6883	TAR	LTR/Ty1	Temperate removal	Zm00042ab171330	668	Pfam	PF13962	Domain of unknown function	168	281	9.3e-25	IPR026961	PGG domain
Tx303	milt_AC198975_6250	Ogre	LTR/Ty3	Temperate removal	Zm00041ab406610	261	Pfam	PF01357	Pollen allergen	161	244	6.4e-25	IPR007117	Expansin, cellulose-binding-like domain
CML52	cinful_zeon_AC209373_10201	Retand	LTR/Ty3	Temperate removal	Zm00019ab084340	321	Pfam	PF00067	Cytochrome P450	38	308	5.8e-25	IPR001128	Cytochrome P450
M162W	prem1_AC206253_9147	NA	LTR/Ty3	Tropical amplification	Zm00033ab104690	385	Pfam	PF05057	Putative serine esterase (DUF676)	147	257	4e-25	IPR007751	Domain of unknown function DUF676, lipase-like
NC350	opie_AC202033_7274	SIRE	LTR/Ty1	Tropical amplification	Zm00036ab071930	206	Pfam	PF00005	ABC transporter	10	148	2.6e-25	IPR003439	ABC transporter-like	GO:0005524|GO:0016887
Mo18W	opie_AC202033_7274	SIRE	LTR/Ty1	Tropical amplification	Zm00034ab074240	206	Pfam	PF00005	ABC transporter	10	148	2.6e-25	IPR003439	ABC transporter-like
CML69	chr6_P_87978263	SIRE	LTR/Ty1	Tropical amplification	Zm00020ab187660	125	Pfam	PF00319	SRF-type transcription factor (DNA-binding and dimerisation domain)	34	80	1.6e-25	IPR002100	Transcription factor, MADS-box
P39	opie_AC202033_7274	SIRE	LTR/Ty1	Tropical amplification	Zm00040ab074460	206	Pfam	PF00005	ABC transporter	10	148	1.5e-25	IPR003439	ABC transporter-like	GO:0005524|GO:0016887
Il14H	opie_AC202033_7274	SIRE	LTR/Ty1	Tropical amplification	Zm00028ab070800	206	Pfam	PF00005	ABC transporter	10	148	1.5e-25	IPR003439	ABC transporter-like
CML69	opie_AC202033_7274	SIRE	LTR/Ty1	Tropical amplification	Zm00020ab070300	206	Pfam	PF00005	ABC transporter	10	148	1.5e-25	IPR003439	ABC transporter-like
CML52	cinful_zeon_AC199790_6582	Retand	LTR/Ty3	Temperate removal	Zm00019ab294460	187	Pfam	PF06749	Protein of unknown function (DUF1218)	58	156	6.8e-26	IPR009606	Modifying wall lignin-1/2
CML322	flip_AC211750_11412	Tekay	LTR/Ty3	Tropical amplification	Zm00025ab173740	586	Pfam	PF00225	Kinesin motor domain	322	418	5.8e-26	IPR001752	Kinesin motor domain
Tx303	cinful_zeon_AC209373_10201	Retand	LTR/Ty3	Temperate removal	Zm00041ab232080	149	Pfam	PF08477	Ras of Complex, Roc, domain of DAPkinase	22	144	4.9e-26
CML247	machiavelli_AC200490_6883	TAR	LTR/Ty1	Temperate removal	Zm00023ab394720	162	Pfam	PF00447	HSF-type DNA-binding	50	139	3.4e-26	IPR000232	Heat shock factor (HSF)-type, DNA-binding
Tzi8	prem1_AC196065_4927	Tekay	LTR/Ty3	Tropical amplification	Zm00042ab345480	459	Pfam	PF01095	Pectinesterase	338	419	2.3e-27	IPR000070	Pectinesterase, catalytic
HP301	machiavelli_AC200490_6883	TAR	LTR/Ty1	Temperate removal	Zm00027ab379080	147	Pfam	PF02458	Transferase family	17	145	2e-27	IPR003480	Transferase
CML52	xilon_diguus_AC203313_7774	Tekay	LTR/Ty3	Tropical amplification	Zm00019ab125140	349	Pfam	PF14226	non-haem dioxygenase in morphine synthesis N-terminal	50	158	1.5e-27	IPR026992	Non-haem dioxygenase N-terminal domain
NC358	xilon_diguus_AC203313_7774	Tekay	LTR/Ty3	Tropical amplification	Zm00037ab272390	253	Pfam	PF05879	Root hair defective 3 GTP-binding protein (RHD3)	1	118	1.2e-27	IPR008803	RHD3/Sey1
CML322	machiavelli_AC200490_6883	TAR	LTR/Ty1	Temperate removal	Zm00025ab226040	519	Pfam	PF01704	UTP--glucose-1-phosphate uridylyltransferase	72	157	1.1e-27	IPR002618	UDPGP family
CML333	flip_AC211750_11412	Tekay	LTR/Ty3	Tropical amplification	Zm00026ab175970	154	Pfam	PF16719	SAWADEE domain	11	119	6.2e-28	IPR032001	SAWADEE domain
CML322	flip_AC211750_11412	Tekay	LTR/Ty3	Tropical amplification	Zm00025ab180390	154	Pfam	PF16719	SAWADEE domain	11	119	6.2e-28	IPR032001	SAWADEE domain
CML247	flip_AC211750_11412	Tekay	LTR/Ty3	Tropical amplification	Zm00023ab178970	154	Pfam	PF16719	SAWADEE domain	11	119	6.2e-28	IPR032001	SAWADEE domain
Tx303	flip_AC211750_11412	Tekay	LTR/Ty3	Tropical amplification	Zm00041ab181290	154	Pfam	PF16719	SAWADEE domain	11	119	3.7e-28	IPR032001	SAWADEE domain
Oh7B	flip_AC211750_11412	Tekay	LTR/Ty3	Tropical amplification	Zm00038ab176830	154	Pfam	PF16719	SAWADEE domain	11	119	2.5e-28	IPR032001	SAWADEE domain
HP301	flip_AC211750_11412	Tekay	LTR/Ty3	Tropical amplification	Zm00027ab176620	154	Pfam	PF16719	SAWADEE domain	11	119	2.5e-28	IPR032001	SAWADEE domain
Tx303	machiavelli_AC200490_6883	TAR	LTR/Ty1	Temperate removal	Zm00041ab406570	266	Pfam	PF01357	Pollen allergen	170	251	2e-28	IPR007117	Expansin, cellulose-binding-like domain
Tx303	prem1_AC212325_11702	Tekay	LTR/Ty3	Tropical amplification	Zm00041ab274440	183	Pfam	PF02458	Transferase family	5	179	6e-29	IPR003480	Transferase
CML277	cinful_zeon_AC208228_9805	Retand	LTR/Ty3	Tropical amplification	Zm00024ab022080	122	Pfam	PF03619	Organic solute transporter Ostalpha	29	114	5.9e-29	IPR005178	Organic solute transporter subunit alpha/Transmembrane protein 184
CML52	xilon_diguus_AC203313_7774	Tekay	LTR/Ty3	Tropical amplification	Zm00019ab374650	334	Pfam	PF16415	CCR4-NOT transcription complex subunit 1 CAF1-binding domain	1	78	5.1e-29	IPR032191	CCR4-NOT transcription complex subunit 1, CAF1-binding domain
CML247	cinful_zeon_AC194347_4039	Retand	LTR/Ty3	Tropical amplification	Zm00023ab282030	182	Pfam	PF03141	Putative S-adenosyl-L-methionine-dependent methyltransferase	87	173	3.1e-29	IPR004159	Putative S-adenosyl-L-methionine-dependent methyltransferase
NC350	xilon_diguus_AC203313_7774	Tekay	LTR/Ty3	Tropical amplification	Zm00036ab256930	658	Pfam	PF03030	Inorganic H+ pyrophosphatase	176	295	2.5e-29	IPR004131	Pyrophosphate-energised proton pump	GO:0004427|GO:0009678|GO:0016020|GO:1902600
P39	machiavelli_AC200490_6883	TAR	LTR/Ty1	Temperate removal	Zm00040ab398560	380	Pfam	PF02458	Transferase family	5	153	2e-29	IPR003480	Transferase	GO:0016747
M37W	xilon_diguus_AC203313_7774	Tekay	LTR/Ty3	Tropical amplification	Zm00032ab404560	758	Pfam	PF12842	Domain of unknown function (DUF3819)	438	526	1.4e-29	IPR024557	CCR4-Not complex, Not1 subunit, domain of unknown function DUF3819
Tx303	xilon_diguus_AC203313_7774	Tekay	LTR/Ty3	Tropical amplification	Zm00041ab362070	491	Pfam	PF00257	Dehydrin	10	271	8.7e-30	IPR000167	Dehydrin
CML333	xilon_diguus_AC203313_7774	Tekay	LTR/Ty3	Tropical amplification	Zm00026ab351350	491	Pfam	PF00257	Dehydrin	10	271	8.7e-30	IPR000167	Dehydrin
CML247	xilon_diguus_AC203313_7774	Tekay	LTR/Ty3	Tropical amplification	Zm00023ab358500	491	Pfam	PF00257	Dehydrin	10	271	8.7e-30	IPR000167	Dehydrin
NC350	xilon_diguus_AC203313_7774	Tekay	LTR/Ty3	Tropical amplification	Zm00036ab256930	658	Pfam	PF01370	NAD dependent epimerase/dehydratase family	325	481	7.4e-30	IPR001509	NAD-dependent epimerase/dehydratase	GO:0003824|GO:0050662
CML52	xilon_diguus_AC203313_7774	Tekay	LTR/Ty3	Tropical amplification	Zm00019ab374650	334	Pfam	PF12842	Domain of unknown function (DUF3819)	209	298	2.6e-30	IPR024557	CCR4-Not complex, Not1 subunit, domain of unknown function DUF3819
CML277	xilon_diguus_AC203313_7774	Tekay	LTR/Ty3	Tropical amplification	Zm00024ab396220	317	Pfam	PF12842	Domain of unknown function (DUF3819)	192	281	2.4e-30	IPR024557	CCR4-Not complex, Not1 subunit, domain of unknown function DUF3819
CML52	cinful_zeon_AC209373_10201	Retand	LTR/Ty3	Temperate removal	Zm00019ab042130	466	Pfam	PF00931	NB-ARC domain	140	332	2e-30	IPR002182	NB-ARC
CML322	xilon_diguus_AC203313_7774	Tekay	LTR/Ty3	Tropical amplification	Zm00025ab402850	309	Pfam	PF12842	Domain of unknown function (DUF3819)	56	149	1.7e-30	IPR024557	CCR4-Not complex, Not1 subunit, domain of unknown function DUF3819
Ki3	machiavelli_AC200490_6883	TAR	LTR/Ty1	Temperate removal	Zm00029ab398300	450	Pfam	PF00365	Phosphofructokinase	93	335	1e-30	IPR000023	Phosphofructokinase domain
B97	machiavelli_AC200490_6883	TAR	LTR/Ty1	Temperate removal	Zm00018ab399920	450	Pfam	PF00365	Phosphofructokinase	93	335	1e-30	IPR000023	Phosphofructokinase domain
Ki11	flip_AC194904_4319	Tekay	LTR/Ty3	Tropical amplification	Zm00030ab282380	242	Pfam	PF00957	Synaptobrevin	125	212	7.4e-31	IPR001388	Synaptobrevin	GO:0016021|GO:0016192
NC358	flip_AC194904_4319	Tekay	LTR/Ty3	Tropical amplification	Zm00037ab285980	221	Pfam	PF00957	Synaptobrevin	125	212	6e-31	IPR001388	Synaptobrevin
CML69	prem1_AC196065_4927	Tekay	LTR/Ty3	Tropical amplification	Zm00020ab182020	534	Pfam	PF04733	Coatomer epsilon subunit	271	363	5.8e-31
P39	ji_AC215728_13156	SIRE	LTR/Ty1	Temperate removal	Zm00040ab158770	255	Pfam	PF01556	DnaJ C terminal domain	34	167	4.1e-31	IPR002939	Chaperone DnaJ, C-terminal
Tx303	cinful_zeon_AC201757_7049	Retand	LTR/Ty3	Tropical amplification	Zm00041ab105200	160	Pfam	PF03110	SBP domain	54	127	1.9e-31	IPR004333	SBP domain
Tx303	prem1_AC196065_4927	Tekay	LTR/Ty3	Tropical amplification	Zm00041ab187240	387	Pfam	PF04733	Coatomer epsilon subunit	123	216	1.5e-31
CML103	prem1_AC196065_4927	Tekay	LTR/Ty3	Tropical amplification	Zm00021ab182430	342	Pfam	PF04733	Coatomer epsilon subunit	123	216	1.2e-31
CML247	xilon_diguus_AC203313_7774	Tekay	LTR/Ty3	Tropical amplification	Zm00023ab041750	291	Pfam	PF00190	Cupin	133	277	1.1e-31	IPR006045	Cupin 1
NC350	cinful_zeon_AC186530_1513	Retand	LTR/Ty3	Tropical amplification	Zm00036ab297740	386	Pfam	PF07690	Major Facilitator Superfamily	124	339	5.1e-32	IPR011701	Major facilitator superfamily	GO:0055085
CML247	cinful_zeon_AC186530_1513	Retand	LTR/Ty3	Tropical amplification	Zm00023ab297420	386	Pfam	PF07690	Major Facilitator Superfamily	124	339	5.1e-32	IPR011701	Major facilitator superfamily
Ky21	opie_AC202033_7274	SIRE	LTR/Ty1	Tropical amplification	Zm00031ab343520	219	Pfam	PF00736	EF-1 guanine nucleotide exchange domain	132	219	4.7e-32	IPR014038	Translation elongation factor EF1B, beta/delta subunit, guanine nucleotide exchange domain	GO:0003746|GO:0006414
CML52	prem1_AC206253_9147	NA	LTR/Ty3	Tropical amplification	Zm00019ab289800	419	Pfam	PF01412	Putative GTPase activating protein for Arf	304	402	2.6e-32	IPR001164	Arf GTPase activating protein
CML228	xilon_diguus_AC203313_7774	Tekay	LTR/Ty3	Tropical amplification	Zm00022ab235330	253	Pfam	PF01412	Putative GTPase activating protein for Arf	138	236	9.3e-34	IPR001164	Arf GTPase activating protein
Tzi8	cinful_zeon_AC186530_1513	Retand	LTR/Ty3	Tropical amplification	Zm00042ab398120	268	Pfam	PF13962	Domain of unknown function	91	200	5.8e-34	IPR026961	PGG domain
NC358	xilon_diguus_AC203313_7774	Tekay	LTR/Ty3	Tropical amplification	Zm00037ab234800	244	Pfam	PF01412	Putative GTPase activating protein for Arf	128	227	5.8e-34	IPR001164	Arf GTPase activating protein
NC358	chr6_P_87978263	SIRE	LTR/Ty1	Tropical amplification	Zm00037ab374610	193	Pfam	PF02309	AUX/IAA family	70	162	3.3e-34	IPR033389	AUX/IAA domain
Ki3	ji_AC204382_8228	unknown	LTR/Ty1	Temperate removal	Zm00029ab379690	119	Pfam	PF00221	Aromatic amino acid lyase	1	116	2.7e-34	IPR001106	Aromatic amino acid lyase
Oh7B	ji_AC200613_6936	SIRE	LTR/Ty1	Tropical amplification	Zm00038ab322790	331	Pfam	PF07859	alpha/beta hydrolase fold	129	308	1.9e-34	IPR013094	Alpha/beta hydrolase fold-3
CML333	prem1_AC206253_9147	NA	LTR/Ty3	Tropical amplification	Zm00026ab064590	506	Pfam	PF06148	COG (conserved oligomeric Golgi) complex component, COG2	25	156	1e-34	IPR024602	Conserved oligomeric Golgi complex, subunit 2, N-terminal
CML52	cinful_zeon_AC209373_10201	Retand	LTR/Ty3	Temperate removal	Zm00019ab149470	231	Pfam	PF00274	Fructose-bisphosphate aldolase class-I	75	163	7.8e-36	IPR000741	Fructose-bisphosphate aldolase, class-I
Ki3	prem1_AC206253_9147	NA	LTR/Ty3	Tropical amplification	Zm00029ab033390	787	Pfam	PF03016	Exostosin family	551	715	8.5e-37	IPR040911	Exostosin, GT47 domain
M162W	cinful_zeon_AC207755_9705	Retand	LTR/Ty3	Temperate removal	Zm00033ab381000	154	Pfam	PF05871	ESCRT-II complex subunit	13	142	5.1e-37	IPR008570	ESCRT-II complex, Vps25 subunit
HP301	cinful_zeon_AC207755_9705	Retand	LTR/Ty3	Temperate removal	Zm00027ab364620	141	Pfam	PF05871	ESCRT-II complex subunit	13	139	3.7e-37	IPR008570	ESCRT-II complex, Vps25 subunit
CML333	cinful_zeon_AC207755_9705	Retand	LTR/Ty3	Temperate removal	Zm00026ab362910	141	Pfam	PF05871	ESCRT-II complex subunit	13	139	3.7e-37	IPR008570	ESCRT-II complex, Vps25 subunit
CML322	cinful_zeon_AC207755_9705	Retand	LTR/Ty3	Temperate removal	Zm00025ab373360	141	Pfam	PF05871	ESCRT-II complex subunit	13	139	3.7e-37	IPR008570	ESCRT-II complex, Vps25 subunit
CML103	sagyfy_AC187059_1735	Retand	LTR/Ty1	Temperate removal	Zm00021ab116890	718	Pfam	PF00931	NB-ARC domain	393	619	2.2e-37	IPR002182	NB-ARC
Tx303	uwum_AC177933_415	unknown	LTR/Ty3	Temperate removal	Zm00041ab186280	228	Pfam	PF13844	Glycosyl transferase family 41	95	184	1.2e-37	IPR029489	O-GlcNAc transferase, C-terminal
B73	uwum_AC177933_415	unknown	LTR/Ty3	Temperate removal	Zm00001eb179230	228	Pfam	PF13844	Glycosyl transferase family 41	95	184	1.2e-37	IPR029489	O-GlcNAc transferase, C-terminal
HP301	prem1_AC200105_6751	Tekay	LTR/Ty3	Tropical amplification	Zm00027ab271730	213	Pfam	PF00026	Eukaryotic aspartyl protease	1	106	1.4e-38	IPR033121	Peptidase family A1 domain
CML322	prem1_AC200105_6751	Tekay	LTR/Ty3	Tropical amplification	Zm00025ab277780	213	Pfam	PF00026	Eukaryotic aspartyl protease	1	106	1.4e-38	IPR033121	Peptidase family A1 domain
CML103	cinful_zeon_AC206171_9091	Retand	LTR/Ty3	Temperate removal	Zm00021ab152250	170	Pfam	PF04062	ARP2/3 complex ARPC3 (21 kDa) subunit	48	166	9.5e-40	IPR007204	Actin-related protein 2/3 complex subunit 3
P39	CRM2_7577nt	CRM	LTR/Ty3	Temperate removal	Zm00040ab096330	205	Pfam	PF01474	Class-II DAHP synthetase family	39	155	5e-40	IPR002480	DAHP synthetase, class II	GO:0003849|GO:0009073
CML333	prem1_AC206253_9147	NA	LTR/Ty3	Tropical amplification	Zm00026ab291210	187	Pfam	PF03094	Mlo family	22	165	4.4e-40	IPR004326	Mlo-related protein
CML333	ruda_AC195952_4839	SIRE	LTR/Ty1	Temperate removal	Zm00026ab102780	142	Pfam	PF07002	Copine	1	128	3.5e-40	IPR010734	Copine
CML69	cinful_zeon_AC194954_4372	Retand	LTR/Ty3	Tropical amplification	Zm00020ab015970	712	Pfam	PF00931	NB-ARC domain	188	429	3.5e-40	IPR002182	NB-ARC
M162W	ruda_AC195952_4839	SIRE	LTR/Ty1	Temperate removal	Zm00033ab334200	366	Pfam	PF00941	FAD binding domain in molybdopterin dehydrogenase	113	283	1.7e-40	IPR002346	Molybdopterin dehydrogenase, FAD-binding
CML247	doke_AC197224_5479	Retand	LTR/Ty3	Tropical amplification	Zm00023ab352110	206	Pfam	PF05721	Phytanoyl-CoA dioxygenase (PhyH)	1	114	7.6e-41	IPR008775	Phytanoyl-CoA dioxygenase
CML228	chr6_P_87978263	SIRE	LTR/Ty1	Tropical amplification	Zm00022ab150840	383	Pfam	PF05637	galactosyl transferase GMA12/MNN10 family	131	344	3.3e-41	IPR008630	Glycosyltransferase 34
CML52	xilon_diguus_AC203313_7774	Tekay	LTR/Ty3	Tropical amplification	Zm00019ab097250	494	Pfam	PF13328	HD domain	224	374	3.2e-41
CML247	ji_AC215728_13156	SIRE	LTR/Ty1	Temperate removal	Zm00023ab368760	423	Pfam	PF00941	FAD binding domain in molybdopterin dehydrogenase	130	300	2.5e-41	IPR002346	Molybdopterin dehydrogenase, FAD-binding
Ki11	machiavelli_AC200490_6883	TAR	LTR/Ty1	Temperate removal	Zm00030ab039240	208	Pfam	PF07993	Male sterility protein	22	160	7.6e-42	IPR013120	Male sterility, NAD-binding
CML277	cinful_zeon_AC186530_1513	Retand	LTR/Ty3	Tropical amplification	Zm00024ab203640	899	Pfam	PF13968	Domain of unknown function (DUF4220)	49	336	3.3e-42	IPR025315	Domain of unknown function DUF4220
Tx303	machiavelli_AC200490_6883	TAR	LTR/Ty1	Temperate removal	Zm00041ab329480	269	Pfam	PF14543	Xylanase inhibitor N-terminal	134	265	1.9e-42	IPR032861	Xylanase inhibitor, N-terminal
Oh43	xilon_diguus_AC203313_7774	Tekay	LTR/Ty3	Tropical amplification	Zm00039ab293750	551	Pfam	PF00854	POT family	273	477	8.5e-44	IPR000109	Proton-dependent oligopeptide transporter family	GO:0016020|GO:0022857|GO:0055085
M37W	doke_AC197224_5479	Retand	LTR/Ty3	Tropical amplification	Zm00032ab143120	1124	Pfam	PF05911	Filament-like plant protein, long coiled-coil	199	398	7.3e-44	IPR008587	Filament-like plant protein
CML277	prem1_AC196065_4927	NA	LTR/Ty3	Tropical amplification	Zm00024ab106910	446	Pfam	PF00928	Adaptor complexes medium subunit family	239	406	7.3e-44	IPR028565	Mu homology domain
NC350	machiavelli_AC200490_6883	TAR	LTR/Ty1	Temperate removal	Zm00036ab040430	221	Pfam	PF07993	Male sterility protein	36	173	6.1e-44	IPR013120	Male sterility, NAD-binding
CML333	opie_AC202033_7274	SIRE	LTR/Ty1	Tropical amplification	Zm00026ab038840	221	Pfam	PF07993	Male sterility protein	36	173	6.1e-44	IPR013120	Male sterility, NAD-binding
CML69	opie_AC202033_7274	SIRE	LTR/Ty1	Tropical amplification	Zm00020ab039900	221	Pfam	PF07993	Male sterility protein	36	173	6.1e-44	IPR013120	Male sterility, NAD-binding
Ki3	machiavelli_AC200490_6883	TAR	LTR/Ty1	Temperate removal	Zm00029ab040590	206	Pfam	PF07993	Male sterility protein	21	158	4.9e-44	IPR013120	Male sterility, NAD-binding
M37W	chr6_P_87978263	SIRE	LTR/Ty1	Tropical amplification	Zm00032ab331940	799	Pfam	PF00689	Cation transporting ATPase, C-terminus	592	769	5.6e-45	IPR006068	Cation-transporting P-type ATPase, C-terminal
Tzi8	opie_AC202033_7274	SIRE	LTR/Ty1	Tropical amplification	Zm00042ab374410	111	Pfam	PF06888	Putative Phosphatase	1	111	3.9e-45	IPR016965	Phosphatase PHOSPHO-type
CML103	chr6_P_87978263	SIRE	LTR/Ty1	Tropical amplification	Zm00021ab187070	766	Pfam	PF02889	Sec63 Brl domain	13	324	2.3e-45	IPR004179	Sec63 domain
Il14H	cinful_zeon_AC186530_1513	Retand	LTR/Ty3	Tropical amplification	Zm00028ab350500	247	Pfam	PF09111	SLIDE	75	185	7.8e-46	IPR015195	SLIDE domain
NC358	doke_AC197224_5479	Retand	LTR/Ty3	Tropical amplification	Zm00037ab345810	251	Pfam	PF05721	Phytanoyl-CoA dioxygenase (PhyH)	11	159	3.5e-46	IPR008775	Phytanoyl-CoA dioxygenase
CML277	prem1_AC206253_9147	NA	LTR/Ty3	Tropical amplification	Zm00024ab087540	201	Pfam	PF00022	Actin	15	129	6.1e-47	IPR004000	Actin family
Oh7B	CRM2_7577nt	CRM	LTR/Ty3	Temperate removal	Zm00038ab135420	742	Pfam	PF03079	ARD/ARD' family	74	205	2e-47	IPR004313	Acireductone dioxygenase ARD family
Ki3	CRM2_7577nt	CRM	LTR/Ty3	Temperate removal	Zm00029ab137280	545	Pfam	PF03079	ARD/ARD' family	80	211	1.2e-47	IPR004313	Acireductone dioxygenase ARD family
M37W	cinful_zeon_AC209373_10201	Retand	LTR/Ty3	Temperate removal	Zm00032ab131710	370	Pfam	PF00079	Serpin (serine protease inhibitor)	124	337	9.3e-48	IPR023796	Serpin domain
CML247	prem1_AC196065_4927	Tekay	LTR/Ty3	Tropical amplification	Zm00023ab219920	170	Pfam	PF05562	Cold acclimation protein WCOR413	24	152	6.9e-50	IPR008892	Cold-regulated 413 protein
Tzi8	prem1_AC206253_9147	NA	LTR/Ty3	Tropical amplification	Zm00042ab186960	431	Pfam	PF01490	Transmembrane amino acid transporter protein	189	407	3.7e-50	IPR013057	Amino acid transporter, transmembrane domain
M162W	prem1_AC206253_9147	NA	LTR/Ty3	Tropical amplification	Zm00033ab190450	430	Pfam	PF01490	Transmembrane amino acid transporter protein	187	406	3.6e-50	IPR013057	Amino acid transporter, transmembrane domain
CML247	chr6_P_87978263	SIRE	LTR/Ty1	Tropical amplification	Zm00023ab388420	399	Pfam	PF03371	PRP38 family	7	161	3.4e-51	IPR005037	Pre-mRNA-splicing factor 38
Ki11	prem1_AC196065_4927	Tekay	LTR/Ty3	Tropical amplification	Zm00030ab102340	526	Pfam	PF00854	POT family	294	523	2e-51	IPR000109	Proton-dependent oligopeptide transporter family	GO:0016020|GO:0022857|GO:0055085
B97	chr6_P_87978263	SIRE	LTR/Ty1	Tropical amplification	Zm00018ab049790	297	Pfam	PF00361	Proton-conducting membrane transporter	141	286	1.5e-51	IPR001750	NADH:quinone oxidoreductase/Mrp antiporter, membrane subunit
Ki11	machiavelli_AC200490_6883	TAR	LTR/Ty1	Temperate removal	Zm00030ab286980	103	Pfam	PF00477	Small hydrophilic plant seed protein	1	102	3.1e-53	IPR038956	Late embryogenesis abundant protein, LEA_5 subgroup
CML52	TE_00002958	Tork	LTR/Ty1	Tropical amplification	Zm00019ab132180	382	Pfam	PF00141	Peroxidase	52	233	1.7e-53	IPR002016	Haem peroxidase
Il14H	ewot_AC210077_10573	Reina	LTR/Ty3	Tropical amplification	Zm00028ab075500	196	Pfam	PF00230	Major intrinsic protein	14	195	1.6e-53	IPR000425	Major intrinsic protein
HP301	ewot_AC210077_10573	Reina	LTR/Ty3	Tropical amplification	Zm00027ab074790	196	Pfam	PF00230	Major intrinsic protein	14	195	1.6e-53	IPR000425	Major intrinsic protein
CML333	ewot_AC210077_10573	Reina	LTR/Ty3	Tropical amplification	Zm00026ab074470	196	Pfam	PF00230	Major intrinsic protein	14	195	1.6e-53	IPR000425	Major intrinsic protein
CML277	uwum_AC190887_2701	unknown	LTR/unknown	Temperate removal	Zm00024ab387690	235	Pfam	PF00940	DNA-dependent RNA polymerase	104	234	5e-55	IPR002092	DNA-directed RNA polymerase, phage-type
CML322	machiavelli_AC200490_6883	TAR	LTR/Ty1	Temperate removal	Zm00025ab084870	415	Pfam	PF03514	GRAS domain family	71	387	1.7e-56	IPR005202	Transcription factor GRAS
NC350	prem1_AC212325_11702	Tekay	LTR/Ty3	Tropical amplification	Zm00036ab085700	561	Pfam	PF00291	Pyridoxal-phosphate dependent enzyme	220	534	8.2e-58	IPR001926	Pyridoxal-phosphate dependent enzyme
CML333	chr6_P_87978263	SIRE	LTR/Ty1	Tropical amplification	Zm00026ab133530	506	Pfam	PF01979	Amidohydrolase family	64	427	1.1e-58	IPR006680	Amidohydrolase-related
Oh43	TE_00007661	NA	LTR/unknown	Tropical amplification	Zm00039ab168090	481	Pfam	PF07002	Copine	289	464	6.3e-59	IPR010734	Copine
CML277	bosohe_AC191654_3248	Reina	LTR/Ty3	Tropical amplification	Zm00024ab307640	263	Pfam	PF04062	ARP2/3 complex ARPC3 (21 kDa) subunit	93	259	2.3e-60	IPR007204	Actin-related protein 2/3 complex subunit 3
CML69	TE_00002958	Tork	LTR/Ty1	Tropical amplification	Zm00020ab334920	286	Pfam	PF00141	Peroxidase	44	232	1e-60	IPR002016	Haem peroxidase
CML228	doke_AC197224_5479	Retand	LTR/Ty3	Tropical amplification	Zm00022ab185720	333	Pfam	PF00368	Hydroxymethylglutaryl-coenzyme A reductase	128	325	4.8e-61	IPR002202	Hydroxymethylglutaryl-CoA reductase, class I/II
CML69	doke_AC197224_5479	Retand	LTR/Ty3	Tropical amplification	Zm00020ab185830	333	Pfam	PF00368	Hydroxymethylglutaryl-coenzyme A reductase	128	325	4.8e-61	IPR002202	Hydroxymethylglutaryl-CoA reductase, class I/II
B73	cinful_zeon_AC208228_9805	Retand	LTR/Ty3	Tropical amplification	Zm00001eb347050	295	Pfam	PF00071	Ras family	92	251	6.8e-62	IPR001806	Small GTPase	GO:0003924|GO:0005525
M162W	cinful_zeon_AC206171_9091	Retand	LTR/Ty3	Temperate removal	Zm00033ab284750	429	Pfam	PF03098	Animal haem peroxidase	84	396	2.8e-62	IPR019791	Haem peroxidase, animal-type
CML322	cinful_zeon_AC206171_9091	Retand	LTR/Ty3	Temperate removal	Zm00025ab279520	429	Pfam	PF03098	Animal haem peroxidase	84	396	2.8e-62	IPR019791	Haem peroxidase, animal-type
Oh7B	avahi_AC191363_3084	NA	LTR/unknown	Tropical amplification	Zm00038ab006680	629	Pfam	PF05701	Weak chloroplast movement under blue light	400	593	9.5e-64	IPR008545	WEB family
M37W	xilon_diguus_AC203313_7774	Tekay	LTR/Ty3	Tropical amplification	Zm00032ab404560	758	Pfam	PF16415	CCR4-NOT transcription complex subunit 1 CAF1-binding domain	138	307	9.2e-66	IPR032191	CCR4-NOT transcription complex subunit 1, CAF1-binding domain
CML69	prem1_AC206253_9147	NA	LTR/Ty3	Tropical amplification	Zm00020ab087160	334	Pfam	PF00022	Actin	88	262	7.3e-67	IPR004000	Actin family
Ky21	chr6_P_87978263	SIRE	LTR/Ty1	Tropical amplification	Zm00031ab308810	407	Pfam	PF00348	Polyprenyl synthetase	113	358	9.7e-73	IPR000092	Polyprenyl synthetase	GO:0008299
Ki11	doke_AC197224_5479	Retand	LTR/Ty3	Tropical amplification	Zm00030ab125000	410	Pfam	PF02458	Transferase family	11	392	9e-75	IPR003480	Transferase	GO:0016747
Ki3	doke_AC197224_5479	Retand	LTR/Ty3	Tropical amplification	Zm00029ab128900	410	Pfam	PF02458	Transferase family	11	392	9e-75	IPR003480	Transferase
CML69	doke_AC197224_5479	Retand	LTR/Ty3	Tropical amplification	Zm00020ab125930	410	Pfam	PF02458	Transferase family	11	392	9e-75	IPR003480	Transferase
M37W	doke_AC197224_5479	Retand	LTR/Ty3	Tropical amplification	Zm00032ab128410	410	Pfam	PF02458	Transferase family	11	392	4.4e-75	IPR003480	Transferase
Ky21	sagyfy_AC187059_1735	Retand	LTR/Ty1	Temperate removal	Zm00031ab300550	430	Pfam	PF00854	POT family	2	386	1.5e-76	IPR000109	Proton-dependent oligopeptide transporter family	GO:0016020|GO:0022857|GO:0055085
Il14H	machiavelli_AC200490_6883	TAR	LTR/Ty1	Temperate removal	Zm00028ab079550	543	Pfam	PF00067	Cytochrome P450	62	532	3e-81	IPR001128	Cytochrome P450
Oh43	cinful_zeon_AC206171_9091	Retand	LTR/Ty3	Temperate removal	Zm00039ab147620	328	Pfam	PF01301	Glycosyl hydrolases family 35	49	310	6.3e-87	IPR031330	Glycoside hydrolase 35, catalytic domain
Oh7B	opie_AC198924_6206	SIRE	LTR/Ty1	Tropical amplification	Zm00038ab114910	283	Pfam	PF03643	Vacuolar protein sorting-associated protein 26	8	228	4.3e-88	IPR028934	Vacuolar protein sorting protein 26 related
Ky21	machiavelli_AC200490_6883	TAR	LTR/Ty1	Temperate removal	Zm00031ab172290	446	Pfam	PF00083	Sugar (and other) transporter	31	443	1.2e-88	IPR005828	Major facilitator, sugar transporter-like	GO:0016021|GO:0022857|GO:0055085
Oh7B	opie_AC202033_7274	SIRE	LTR/Ty1	Tropical amplification	Zm00038ab004680	612	Pfam	PF00225	Kinesin motor domain	63	395	3.6e-96	IPR001752	Kinesin motor domain
Ki11	moorud_AC199961_6697	Reina	LTR/Ty3	Tropical amplification	Zm00030ab284010	389	Pfam	PF03151	Triose-phosphate Transporter family	95	377	7.2e-104	IPR004853	Sugar phosphate transporter domain
HP301	cinful_zeon_AC186530_1513	Retand	LTR/Ty3	Tropical amplification	Zm00027ab179870	412	Pfam	PF05212	Protein of unknown function (DUF707)	99	344	3.7e-104	IPR007877	Protein of unknown function DUF707
B97	cinful_zeon_AC186530_1513	Retand	LTR/Ty3	Tropical amplification	Zm00018ab183760	412	Pfam	PF05212	Protein of unknown function (DUF707)	100	344	5.4e-105	IPR007877	Protein of unknown function DUF707
Ki3	chr6_P_87978263	SIRE	LTR/Ty1	Tropical amplification	Zm00029ab296970	453	Pfam	PF03151	Triose-phosphate Transporter family	145	441	5.4e-107	IPR004853	Sugar phosphate transporter domain
B97	avahi_AC191363_3084	NA	LTR/unknown	Tropical amplification	Zm00018ab006750	1051	Pfam	PF05701	Weak chloroplast movement under blue light	400	950	4.5e-163	IPR008545	WEB family
Mo18W	prem1_AC212325_11702	Tekay	LTR/Ty3	Tropical amplification	Zm00034ab283560	535	Pfam	PF00183	Hsp90 protein	15	505	2e-185	IPR001404	Heat shock protein Hsp90 family
