# Supplementary material for: Differences in activity and stability drive transposable element variation in tropical and temperate maize
Source: HighWire-hosted journal article supplement (doi:10.1101/gr.278131.123), 2024-08-01
Supplement: Supplemental_Table_S6.xlsx [file Supplemental_Table_S6.xlsx]

## Sheet: Supplemental Table S6
Supplemental Table S6. NAM line NLR gene annotation and clustering statistics.
NAM Line	Ecotype	NLR genes # (Prigozhin et al. 2022)	NLR genes # (NLR-Annotator)	NLR genes shared b/t Prigozhin and NLR-Annotator datasets (%)	Total NLR genes	Singleton NLR genes	NLR gene clusters	NLR genes in clusters	Non-singleton NLR genes not clustered	Average NLR cluster size (gene count)	Average NLR cluster size (kb)	% NLR genes clustered
B73	temperate	126	130	0.841	150	77	20	49	24	2.5	65.9	0.327
B97	temperate	125	133	0.824	155	65	23	59	31	2.6	57.8	0.381
HP301	temperate	119	136	0.871	131	69	12	35	27	2.9	72.7	0.267
Il14H	temperate	126	136	0.864	150	71	21	50	29	2.4	53	0.333
Ky21	temperate	121	122	0.849	145	72	16	41	32	2.6	53.8	0.283
M162W	temperate	131	138	0.861	143	68	19	47	28	2.5	49.2	0.329
Ms71	temperate	120	133	0.852	143	75	19	46	22	2.4	57.4	0.322
Oh43	temperate	132	150	0.847	154	73	20	49	32	2.5	58.5	0.318
Oh7B	temperate	130	128	0.835	147	83	18	45	19	2.5	46.7	0.306
P39	temperate	134	161	0.839	141	69	18	44	28	2.4	77.1	0.312
CML103	tropical	116	116	0.849	154	71	19	53	30	2.8	67.6	0.344
CML228	tropical	125	133	0.794	162	75	17	50	37	2.9	72.2	0.309
CML247	tropical	126	126	0.86	128	70	17	38	20	2.2	38.5	0.297
CML277	tropical	122	126	0.865	151	78	22	55	18	2.5	57.8	0.364
CML322	tropical	122	125	0.843	141	66	20	50	25	2.5	48.8	0.355
CML333	tropical	131	134	0.863	156	74	22	58	24	2.6	72.6	0.372
CML52	tropical	121	127	0.815	166	70	25	65	31	2.6	35.2	0.392
CML69	tropical	118	122	0.827	157	80	20	56	21	2.8	68.9	0.357
Ki11	tropical	114	112	0.85	151	75	17	58	18	3.4	104.5	0.384
Ki3	tropical	126	134	0.845	151	77	20	48	26	2.4	48.6	0.318
NC350	tropical	129	131	0.838	174	71	23	76	27	3.3	73.1	0.437
NC358	tropical	136	152	0.864	168	79	19	65	24	3.4	78.3	0.387
Tzi8	tropical	121	121	0.831	150	67	20	51	32	2.6	66.8	0.34
M37W	admixed	130	142	0.866	179	72	21	77	30	3.7	76	0.43
Mo18W	admixed	133	134	0.863	136	69	18	49	18	2.7	67.9	0.36
Tx303	admixed	117	120	0.843	140	67	19	46	27	2.4	64.3	0.329
