# Supplementary material for: Differences in activity and stability drive transposable element variation in tropical and temperate maize
Source: HighWire-hosted journal article supplement (doi:10.1101/gr.278131.123), 2024-08-01
Supplement: Supplemental_Table_S7.xlsx [file Supplemental_Table_S7.xlsx]

## Sheet: Supplemental Table S7
Supplemental Table S7. Summary of Fisher's exact test for enrichment of TE families in the TE neighborhood of NLR clusters in tropical lines.
TEs in neighborhood	TE family	Odds ratio	Bonferroni P value	P value	NLR proximal family members	NLR proximal non-family members	Background family members	Background non-family members	Classification	Trop - Temp diff (Mb)	Avg fam size (Mb)
10	giepum_AC197531_5634	2.0699	0.0270702	7.18042e-05	37	2622	4353	638525	Young	0.414185	9.71344
10	chr6_D_62813001	2.8071	0.0231743	6.14704e-05	20	2639	1731	641147	Young	0.210956	4.97108
10	gudyeg_AC206942_9404	2.9137	0.0216767	5.74979e-05	19	2640	1584	641294	Old	-0.0587153	4.25702
10	opie_AC188002_2029	2.0432	0.00236363	6.26957e-06	50	2609	5974	636904	Moderate	0.141998	4.90802
10	depuw_AC208349_9837	10.2617	0.000756778	2.00737e-06	8	2651	189	642689	Young	-0.0162433	0.214047
10	ebel_AC188777_2128	3.4516	0.000151873	4.02847e-07	24	2635	1692	641186	Young	-0.0291277	1.14088
10	milt_AC198975_6250	3.3173	0.000107529	2.85224e-07	26	2633	1908	640970	Moderate	0.0998417	4.24934
10	chr9_D_32444039	10.7019	3.26719e-07	8.66629e-10	13	2646	295	642583	Young	0.409046	6.39609
10	vegu_AC190718_85	3.652	1.79296e-07	4.75587e-10	34	2625	2272	640606	Moderate	-0.116108	2.94998
