# Supplementary figures and images for: Differences in activity and stability drive transposable element variation in tropical and temperate maize
Source: HighWire-hosted journal article supplement (doi:10.1101/gr.278131.123), 2024-08-01

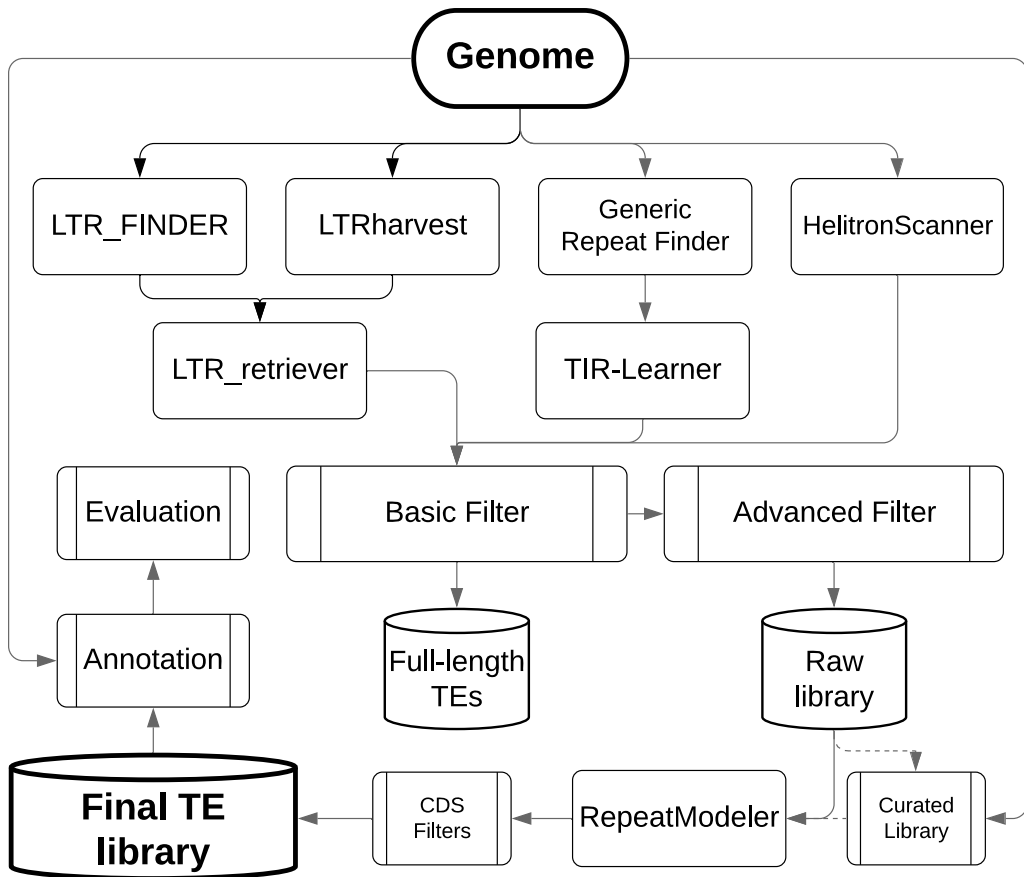

Supplement: Supplemental_Code.zip [file EDTA workflow.pdf › Supplemental Code/EDTA-master/development/EDTA workflow.pdf]
